# Supplementary material for: High-parametric protein maps reveal the spatial organization in early-developing human lung
Source: Springer Nature journal article supplement (doi:10.1038/s41467-024-53752-x), 2024-10-30
Supplement: MOESM1 [file 41467_2024_53752_MOESM1_ESM.pdf]

## SUPPLEMENTARY INFORMATION

# High-parametric protein maps reveal the spatial organization in early-developing human lung

Sanem Sariyar<sup>1,2</sup>, Alexandros Sountoulidis<sup>1,3</sup>, Jan Niklas Hansen<sup>1,2,4</sup>,  
Sergio Marco Salas<sup>1,5</sup>, Mariya Mardamshina<sup>1,2</sup>, Anna Martinez Casals<sup>1,2,4</sup>,  
Frederic Ballllosera Navarro<sup>1,2,4</sup>, Zanita Andrusivova<sup>1,6</sup>, Xiaofei Li<sup>7</sup>, Paulo Czarnewski<sup>1,6</sup>, Joakim  
Lundeberg<sup>1,6</sup>, Sten Linnarsson<sup>8</sup>, Mats Nilsson<sup>1,5</sup>, Erik Sundström<sup>7</sup>,  
Christos Samakovlis<sup>1,3,9</sup>, Emma Lundberg<sup>1,2,4,10,\*,#</sup>, Burcu Ayoglu<sup>1,2,\*,#</sup>

<sup>1</sup>Science for Life Laboratory, Solna, Sweden

<sup>2</sup>Department of Protein Science, KTH - Royal Institute of Technology, Stockholm, Sweden

<sup>3</sup>Department of Molecular Biosciences, Wenner-Gren Institute, Stockholm University, Stockholm, Sweden

<sup>4</sup>Department of Bioengineering, Stanford University, Stanford, CA, USA

<sup>5</sup>Department of Biochemistry and Biophysics, Stockholm University, Stockholm, Sweden.

<sup>6</sup>Department of Gene Technology, KTH - Royal Institute of Technology, Stockholm, Sweden

<sup>7</sup>Department of Neurobiology, Care Sciences and Society, Karolinska Institutet, Stockholm, Sweden

<sup>8</sup>Department of Medical Biochemistry and Biophysics, Karolinska Institute, Stockholm, Sweden

<sup>9</sup>Molecular Pneumology, Cardiopulmonary Institute, Justus Liebig University, Giessen, Germany

<sup>10</sup>Department of Pathology, Stanford University, Stanford, CA, USA

\* Equal contribution

# Correspondence should be addressed to: [burcu.ayoglu@scilifelab.se](mailto:burcu.ayoglu@scilifelab.se) or [emmalu@stanford.edu](mailto:emmalu@stanford.edu)

## Supplementary Discussion Point

A number of cell type clusters in analyses shown in **Figure 2A-B** and **Figure 3A-B**, **Figure 4**, and all related supplementary figures were not represented uniformly across all the weeks due to a number of technical reasons:

As shown by the podoplanin (PDPN) antibody staining patterns in **Figure 1D**, mesothelial cells were indeed present at all five developmental weeks. However, as detailed in **Supplementary Figure 4A**, in the relatively larger tissues of the 8.5 week and all later-stage lung samples, we experienced uneven signal intensity for various markers in peripheral regions, causing issues in downstream clustering after image segmentation. Thus, we removed these peripheral regions before downstream data analysis. This impacted the representation of mesothelial cells in all weeks except the week 6 in the downstream analyses.

Chondroblasts were missing in the 12 week old sample because the section presented for the 12 week old sample originated from a relatively more peripheral region of the organ, representing more distal parts of the airway network as compared to other samples.

For the pericytes and the airway fibroblasts, we did not have single specific markers for these cell types. Instead, similar to neuronal cells, we used a combination of several markers that provided clusters with characteristic signatures aligning with the positioning and morphology of these cells in the tissue images. This approach, while demonstrating the strength of multi-parametric image analysis at the protein level, is prone to underperform if one or more of the markers do not perform equally well (*e.g.* ACTA2 in week 12 compared to weeks 11 and 13), affecting the clustering performance.

Adventitial fibroblasts are localized within the bronchovascular bundles of the lung<sup>1</sup>. Among the analyzed sections, only those from the week 11 sample contained such a central part of the organ. This provides an explanation about their absence in more peripheral lung sections.



**Supplementary Table 1. List of and detailed information on all evaluated antibodies.**

Detailed information such as catalogue number, clone ID, target, selection reason, conjugated barcode, indirect IF dilutions and tested tissues, failed steps for all evaluated antibodies in the study. In the “Failed step” column, the step where antibodies failed is reported according to the evaluation after the indirect IF, conjugation or multiplexed imaging run.

**LIST OF ALL TESTED ANTIBODIES**

| Antibodies      | Catalog number | Clone       | RRID        | Target                                     | Selection Reason     | Barcodes of Akoya Immune Panel Antibodies | Regular IF Dilution | Regular IF Tested Tissue  | In-House Conjugated/Barcode | Failed Step                            | Phenocycler Dilutions | Worked in the run |
|-----------------|----------------|-------------|-------------|--------------------------------------------|----------------------|-------------------------------------------|---------------------|---------------------------|-----------------------------|----------------------------------------|-----------------------|-------------------|
| ACTA2           | ab119952       | 4A4         | AB_10901360 | Smooth muscle actin                        | sc-RNAseq            | N/A                                       | 1/200               | Fetal lung 13 pcw         | BX028                       | N/A                                    | 1/70                  | Yes               |
| ASCL1           | ab240385       | EPR19840    |             | Neuroendocrine cells                       | sc-RNAseq            | N/A                                       | 1/50- 1/100         | Fetal lung 8.5 pcw        | N/A                         | Failed in Regular IF                   | N/A                   | N/A               |
| CD104           | 4250008        | 58XB4       |             | Epithelial cells                           | Akoya Immune Panel   | BX005                                     | N/A                 | N/A                       | N/A                         | Failed in the run                      | N/A                   | N/A               |
| CD11c           | 4350012        | S-HCL-3     |             | Dendritic cells/ macrophages               | Akoya Immune Panel   | BX027                                     | N/A                 | N/A                       | N/A                         | Failed in the run                      | N/A                   | N/A               |
| CD123           | # 14-1239-82   | 6H6         | AB_467453   | Endothelial cells&Hematopoietic stem cells | Literature/sc-RNAseq | N/A                                       | 1/100               | Tonsil                    | BX54                        | N/A                                    | 1/100                 | Yes               |
| CD14            | # 14-0149-82   | 6103        |             | Monocyte                                   | Literature/sc-RNAseq | N/A                                       | 1/50                | Tonsil/Spleen             | BX006                       | Failed in the run                      | N/A                   | N/A               |
| CD144           | # 14-1449-82   | 16B1        | AB_467495   | Endothelial cells&Hematopoietic stem cells | Literature/sc-RNAseq | N/A                                       | 1/100               | Pancreas                  | BX016                       | N/A                                    | 1/100                 | Yes               |
| CD163           | HPA046404      |             |             | Macrophages                                | Literature/sc-RNAseq | N/A                                       | 1/130               | Fetal lung 13 pcw         | BX025                       | Failed in Conjugation                  | N/A                   | N/A               |
| CD163           | # MA5-17716    | GHI/61      | AB_2539106  | Macrophages                                | Literature/sc-RNAseq | N/A                                       | 1/50                | Fetal lung 13 pcw         | BX049/ BX005                | N/A                                    | 1/50                  | Yes               |
| CD19            | 4350003        | HIB19       |             | B cells                                    | Akoya Immune Panel   | BX003                                     | N/A                 | N/A                       | N/A                         | N/A                                    | 1/100                 | Yes               |
| CD2             | 4250005        | RPA-2.10    |             | T cells                                    | Akoya Immune Panel   | BX002                                     | N/A                 | N/A                       | N/A                         | Failed in the run                      | N/A                   | N/A               |
| CD20            | # 14-0202-82   | L26         |             | B cells                                    | Literature/sc-RNAseq | N/A                                       | 1/100- 1/1000       | Spleen                    | N/A                         | Failed in Regular IF                   | N/A                   | N/A               |
| CD21            | 4150009        | Bu32        |             | B cells                                    | Akoya Immune Panel   | BX013                                     | N/A                 | N/A                       | N/A                         | Failed in the run                      | N/A                   | N/A               |
| CD278           | 4250013        | C398.4A     |             | Activated helper and cytotoxic cells       | Akoya Immune Panel   | BX017                                     | N/A                 | N/A                       | N/A                         | Failed in the run                      | N/A                   | N/A               |
| CD279           | 4250010        | EH12.2H7    |             | T cells                                    | Akoya Immune Panel   | BX014                                     | N/A                 | N/A                       | N/A                         | Failed in the run                      | N/A                   | N/A               |
| CD3             | 4350008        | UCHT1       |             | T cells                                    | Akoya Immune Panel   | BX015                                     | N/A                 | N/A                       | N/A                         | N/A                                    | 1/200                 | Yes               |
| CD31            | 4250009        | WM59        |             | Endothelial cells                          | Akoya Immune Panel   | BX032                                     | N/A                 | N/A                       | N/A                         | N/A                                    | 1/200                 | Yes               |
| CD34            | 4250020        |             | 561         | Endothelial cells                          | Akoya Immune Panel   | BX035                                     | N/A                 | N/A                       | N/A                         | N/A                                    | 1/200                 | Yes               |
| CD38            | 4150007        | FF          |             | General immune cells marker                | Akoya Immune Panel   | BX007                                     | N/A                 | N/A                       | N/A                         | Failed in the run                      | N/A                   | N/A               |
| CD4             | 4350010        | SK3         |             | Helper T cells                             | Akoya Immune Panel   | BX021                                     | N/A                 | N/A                       | N/A                         | N/A                                    | 1/200                 | Yes               |
| CD41            | HPA031169      |             |             | Megakaryocytes                             | Literature/sc-RNAseq | N/A                                       | 1/250               | Fetal lung 13 pcw         | BX041                       | Failed in Conjugation                  | N/A                   | N/A               |
| CD44            | # MA4400       | Hermes-1    | AB_223517   | Hematopoietic stem cells                   | Literature/sc-RNAseq | N/A                                       | 1/50                | Fetal Lung 12 pcw         | BX020                       | N/A                                    | 1/100                 | Yes               |
| CD45            | 4150003        | Hi30        |             | General immune cells marker                | Akoya Immune Panel   | BX001                                     | N/A                 | N/A                       | N/A                         | N/A                                    | 1/100                 | Yes               |
| CD56            | # MA1-06801    | 123C3       |             | NK cells                                   | Literature/sc-RNAseq | N/A                                       | 1/100               | Pancreas                  | BX029                       | Regular IF                             | N/A                   | N/A               |
| CD56            | ab251595       | CAL53       |             | NK cells                                   | Literature/sc-RNAseq | N/A                                       | 1/50                | Fetal lung 13 pcw         | BX029                       | N/A                                    | 1/50                  | Yes               |
| CD59            | # MA5-17046    | 8D2B8       |             | Lineage marker                             | Literature           | N/A                                       | 1/200               | Pancreas                  | BX033                       | Failed in the run                      | N/A                   | N/A               |
| CD68            | # 14-0688-82   | KP1         | AB_11151139 | Macrophage                                 | Literature/sc-RNAseq | N/A                                       | 1/100               | Tonsil                    | BX10                        | N/A                                    | 1/100                 | Yes               |
| CD69            | 4250022        | FN50        |             | Lymphocyte activation marker               | Akoya Immune Panel   | BX041                                     | N/A                 | N/A                       | N/A                         | Failed in the run                      | N/A                   | N/A               |
| CD7             | 4150022        | CD7-6B7     |             | Differentiation marker for T cells         | Akoya Immune Panel   | BX025                                     | N/A                 | N/A                       | N/A                         | Failed in the run                      | N/A                   | N/A               |
| CD8             | 4150004        | SK1         |             | Cytotoxic T cells                          | Akoya Immune Panel   | BX004                                     | N/A                 | N/A                       | N/A                         | Failed in the run                      | N/A                   | N/A               |
| CD9             | 4150016        | Hi9a        |             | Myeloid cell lineage cells                 | Akoya Immune Panel   | BX028                                     | N/A                 | N/A                       | N/A                         | Failed in the run                      | N/A                   | N/A               |
| CD90            | 4150021        | 5E10        |             | Stem cells                                 | Akoya Immune Panel   | BX022                                     | N/A                 | N/A                       | N/A                         | N/A                                    | 1/200                 | Yes               |
| CKIT            | #348800        | 2B8         |             | Hematopoietic stem cells                   | Literature/sc-RNAseq | N/A                                       | 1/125               | Mouse cerebellum          | BX45                        | Failed in the run                      | N/A                   | N/A               |
| CKIT            | HPA073252      |             |             | Hematopoietic stem cells                   | Literature/sc-RNAseq | N/A                                       | 1/30                | Fetal lung 13 pcw         | BX050                       | Failed in Conjugation                  | N/A                   | N/A               |
| CLDN5           | # 35-2500      | 4C3C2       | AB_2533200  | Endothelial cells                          | sc-RNAseq            | N/A                                       | 1/100               | Fetal lung 7 w            | BX041                       | N/A                                    | 1/100                 | Yes               |
| COL1A1          | MAB6220-100    | # 816161    |             | Mesenchymal                                | sc-RNAseq            | N/A                                       | 1/100               | Fetal lung 13 pcw         | BX002                       | N/A                                    | 1/300                 | Yes               |
| CSF1R           | ab240265       | SP211       |             | Macrophages                                | sc-RNAseq            | N/A                                       | 1/100               | Fetal lung 13 pcw         | BX017/BX036                 | Failed in the run                      | N/A                   | N/A               |
| CKCR4           | # 35-8800      | 12G5        |             | Hematopoietic stem cells                   | Literature/sc-RNAseq | N/A                                       | 1/50-1/500          | Spleen                    | N/A                         | Failed in Regular IF                   | N/A                   | N/A               |
| DCN             | HPA003315      |             |             | Mesenchymal                                | sc-RNAseq            | N/A                                       | 1/200               | Fetal lung 13 pcw         | BX013                       | N/A                                    | 1/50                  | Yes               |
| Ecadherin       | 4250021        | 4A2C7       |             | Epithelial Cells                           | Akoya FFPE Panel     | BX014                                     | N/A                 | N/A                       | N/A                         | N/A                                    | 1/200                 | Yes               |
| EPCAM           | #14932682      | 1B7         | AB_795876   | Epithelial cells                           | sc-RNAseq            | N/A                                       | 1/100               | Fetal lung 13 pcw         | BX042                       | N/A                                    | 1/400                 | Yes               |
| FLT3            | # PA5-34448    |             |             | Hematopoietic stem cells                   | Literature/sc-RNAseq | N/A                                       | 1/50-1/500          | Spleen                    | N/A                         | Failed in Regular IF                   | N/A                   | N/A               |
| GP1BA           | HPA013316      |             |             | Megakaryocytes                             | Literature/sc-RNAseq | N/A                                       | 1/110               | Fetal lung 13 pcw         | BX045                       | Failed in Conjugation                  | N/A                   | N/A               |
| GPC3            | # MA5-17083    | 9C2         |             | Alveolar fibroblast                        | sc-RNAseq            | N/A                                       | 1/100               | Fetal lung 7 w            | N/A                         | Failed in Regular IF                   | N/A                   | N/A               |
| GRHL2           | # MA5-31388    | CL3760      |             | Mesenchyme                                 | sc-RNAseq            | N/A                                       | 1/250               | Fetal lung 13 pcw         | BX024                       | Failed in Regular IF                   | N/A                   | N/A               |
| HHIP            | H00064399-M01  | 5D11        |             | Lung airways                               | sc-RNAseq            | N/A                                       | 1/50                | Fetal lung 13 pcw         | N/A                         | Failed in Regular IF                   | N/A                   | N/A               |
| HLA-DR          | 4250006        | L243        |             | Antigen presenting cells                   | Akoya Immune Panel   | BX026                                     | N/A                 | N/A                       | N/A                         | N/A                                    | 1/200                 | Yes               |
| HPGD            | NB200-179      |             |             | Aerocytes                                  | sc-RNAseq            | N/A                                       | 1/100               | Fetal lung 7 w            | N/A                         | Failed in Regular IF                   | N/A                   | N/A               |
| IBA1            | ab221790       | EPR16589    |             | Macrophages                                | sc-RNAseq            | N/A                                       | 1/50                | Fetal Lung 12 pcw         | BX30, BX027                 | Failed in Conjugation                  | N/A                   | N/A               |
| IBA1            | ab220815       | EPR16588    |             | Macrophages                                | sc-RNAseq            | N/A                                       | 1/100               | Fetal lung 7 w            | BX036                       | Failed in the run                      | N/A                   | N/A               |
| Ki67            | 4250019        | B56         |             | Proliferating cells                        | Akoya Immune Panel   | BX047                                     | N/A                 | N/A                       | N/A                         | N/A                                    | 1/200                 | Yes               |
| LYZ             | ab185129       | EPR2994(2)  |             | Macrophages                                | sc-RNAseq            | N/A                                       | 1/1000              | Fetal lung 7 w            | BX050                       | Failed in Conjugation                  | N/A                   | N/A               |
| MCM3            | SAB1404055     | 3E1         |             | Proliferating cells                        | sc-RNAseq            | N/A                                       | 1/50                | Fetal lung 13 pcw         | N/A                         | Failed in Regular IF                   | N/A                   | N/A               |
| MRC1            | ab64693        | N/A         | AB_1523910  | Macrophages                                | sc-RNAseq            | N/A                                       | 1/500               | Fetal lung 13 pcw         | BX030                       | N/A                                    | 1/100                 | Yes               |
| NRXN1           | #703650        | 22H29L23    |             | Cell adhesion                              | sc-RNAseq            | N/A                                       | 1/100               | Fetal lung 13 pcw         | N/A                         | Failed in Regular IF                   | N/A                   | N/A               |
| Pan-cytokeratin | 4150020        | AE-1/AE-3   |             | Epithelial Cells                           | Akoya Immune Panel   | BX019                                     | N/A                 | N/A                       | N/A                         | N/A                                    | 1/300                 | Yes               |
| PDGFRB          | MA535288       | ARC0009     |             | Mesenchymal                                | sc-RNAseq            | N/A                                       | 1/100               | Fetal lung 13 pcw         | N/A                         | Failed in Regular IF                   | N/A                   | N/A               |
| PDGFRB          | AF385          |             |             | Mesenchymal                                | sc-RNAseq            | N/A                                       | 1/100               | Fetal lung 13 pcw         | N/A                         | Failed in Regular IF                   | N/A                   | N/A               |
| Podoplanin      | 4250004        | NC-08       |             | Lymphatic endothelial cells                | Akoya Immune Panel   | BX023                                     | N/A                 | N/A                       | N/A                         | N/A                                    | 1/200                 | Yes               |
| PRX             | ab278083       | EPR24150-36 |             | Capillaries                                | sc-RNAseq            | N/A                                       | 1/100               | Fetal lung 7 w            | BX052                       | N/A                                    | 1/100                 | Yes               |
| PSAP            | ab249391       | EPR10784(B) |             | Macrophages                                | sc-RNAseq            | N/A                                       | 1/50                | Fetal lung 13 pcw         | BX055                       | Unsure Regular IF & Failed conjugation | N/A                   | N/A               |
| RUNX1           | SAB1412471     | 3A1         |             | Hematopoietic stem cells                   | Literature/sc-RNAseq | N/A                                       | 1/50                | Fetal lung 13 pcw, Spleen | N/A                         | Failed in Regular IF                   | N/A                   | N/A               |
| RUNX1           | H00000861-M06  | IM06        |             | Hematopoietic stem cells                   | Literature/sc-RNAseq | N/A                                       | 1/300               | Fetal lung 12 pcw         | N/A                         | Failed in Regular IF                   | N/A                   | N/A               |
| RUNX1           | HPA004176      |             |             | Hematopoietic stem cells                   | Literature/sc-RNAseq | N/A                                       | 1/25                | Fetal lung 7 pcw          | N/A                         | Failed in Regular IF                   | N/A                   | N/A               |
| Serglycin       | # PA5-50794    |             |             | Hematopoietic stem cells                   | Literature/sc-RNAseq | N/A                                       | 1/100               | Fetal lung 13 pcw         | BX025- BX030                | Failed in Conjugation                  | N/A                   | N/A               |
| SFTPC           | H0006440-M01   | 4A10        |             | Type 2 alveolar cells                      | sc-RNAseq            | N/A                                       | 1/100               | Fetal lung 13 pcw         | N/A                         | Failed in Regular IF                   | N/A                   | N/A               |
| SOX2            | 14-9811-82     | Btjce       | AB_11219471 | Proximal epithelial cells                  | sc-RNAseq            | N/A                                       | 1/250               | Fetal Lung 8.5 pcw        | BX024                       | N/A                                    | 1/200                 | Yes               |
| SOX9            | MA5-17177      | 1B11        |             | Distal epithelial cells                    | sc-RNAseq            | N/A                                       | 1/200               | Fetal Lung 8.5 pcw        | N/A                         | Failed in Regular IF                   | N/A                   | N/A               |
| SOX9            | AF3075         |             | AB_2194160  | Distal epithelial cells                    | sc-RNAseq            | N/A                                       | 1/500               | Fetal lung 7 w            | BX033                       | N/A                                    | 1/250                 | Yes               |
| TTF1            | ab216648       | EP1584Y     |             | Airway cells                               | sc-RNAseq            | N/A                                       | 1/250               | Whole embryo              | BX007                       | N/A                                    | 1/100                 | Yes               |
| Vimentin        | 677802         | O91D3       | AB_2565982  | Mesenchymal                                | sc-RNAseq            | N/A                                       | 1/50                | Fetal lung 13 pcw         | BX045                       | N/A                                    | 1/300                 | Yes               |
| WT1             | # MA1-46028    | 6F-H2       | AB_962464   | Mesothelium                                | sc-RNAseq            | N/A                                       | 1/400               | Fetal lung 13 pcw         | BX006                       | N/A                                    | 1/50                  | Yes               |

**Supplementary Table 2. Values for background subtraction.** Values for background subtraction for all the markers and developmental weeks.

|                       | <b>6 pcw</b> | <b>8.5 pcw</b> | <b>11 pcw</b> | <b>12 pcw</b> | <b>13 pcw</b> |
|-----------------------|--------------|----------------|---------------|---------------|---------------|
| <b>ACTA2</b>          | 0.4576       | 13.494         | 0.8668        | 0.06          | 0.4301        |
| <b>CD3</b>            | 3.3022       | 0.385          | 8.1543        | 3.2307        | 1.3552        |
| <b>CD4</b>            | 23.0351      | 2.378          | 0.5302        | 6.6352        | 3.1262        |
| <b>CD19</b>           | 1.9756       | 15.017         | 0.0528        | 1.8601        | 3.2164        |
| <b>CD31</b>           | 0.1232       | 0.791          | 1.4586        | 5.507         | 8.179         |
| <b>CD34</b>           | 0.0418       | 0.152          | 0.2816        | 0.461         | 3.198         |
| <b>CD44</b>           | 3.3792       | 4.9            | 4.908         | 4.4517        | 24.0          |
| <b>CD45</b>           | 1.5235       | 1.873          | 4.2471        | 3.4507        | 0.0737        |
| <b>CD56</b>           | 0.1518       | 2.386          | 2.2077        | 0.0517        | 0.5819        |
| <b>CD68</b>           | 20.372       | 14.277         | 20.3258       | 17.8244       | 9.886         |
| <b>CD90</b>           | 10.0507      | 7.938          | 7.287         | 15.1866       | 7.0           |
| <b>CD123</b>          | 0.8          | 0.230          | 2.3969        | 1.6126        | 0.1628        |
| <b>CD144</b>          | 4.8          | 4.719          | 3.5992        | 6.6           | 1.782         |
| <b>CD163</b>          | 2.1252       | 0.773          | 0.3883        | 5.6958        | 4.5078        |
| <b>CLDN5</b>          | 6.3481       | 11.708         | 0.3179        | 0.2343        | 0.6094        |
| <b>COL1A1</b>         | 3.105        | 3.083          | 0.8679        | 1.3849        | 1.0912        |
| <b>DCN</b>            | 6.0          | 10.0           | 10.0          | 6.5           | 8.9           |
| <b>Ecadherin</b>      | 0.3223       | 0.068          | 0.2211        | 0.9812        | 0.5115        |
| <b>EPCAM</b>          | 1.9305       | 2.750          | 7.5438        | 6.864         | 10.9747       |
| <b>HLADR</b>          | 0.3509       | 0.114          | 1.2001        | 5.124         | 1.3376        |
| <b>KI67</b>           | 8.0          | 1.4            | 0.1298        | 0.0671        | 0.143         |
| <b>MRC1</b>           | 4.8939       | 0.286          | 0.1221        | 15.609        | 2.2374        |
| <b>Pancytokeratin</b> | 0.7854       | 2.192          | 3.0316        | 0.2992        | 0.022         |
| <b>Podoplanin</b>     | 0.8602       | 11.080         | 3.6212        | 1.5257        | 3.4892        |
| <b>PRX</b>            | 0.055        | 0.025          | 0.143         | 0.0209        | 0.0209        |
| <b>SOX2</b>           | 1.0604       | 0.232          | 0.4125        | 0.0363        | 3.0932        |
| <b>SOX9</b>           | 7.9354       | 16.633         | 0.5709        | 4.0546        | 1.2672        |
| <b>TTF1</b>           | 1.8656       | 5.008          | 6.1809        | 1.9426        | 0.198         |
| <b>Vimentin</b>       | 8.9419       | 8.020          | 0.9834        | 4.4363        | 3.9633        |
| <b>WT1</b>            | 13.0         | 9.0            | 3.5           | 8.437         | 0.4741        |

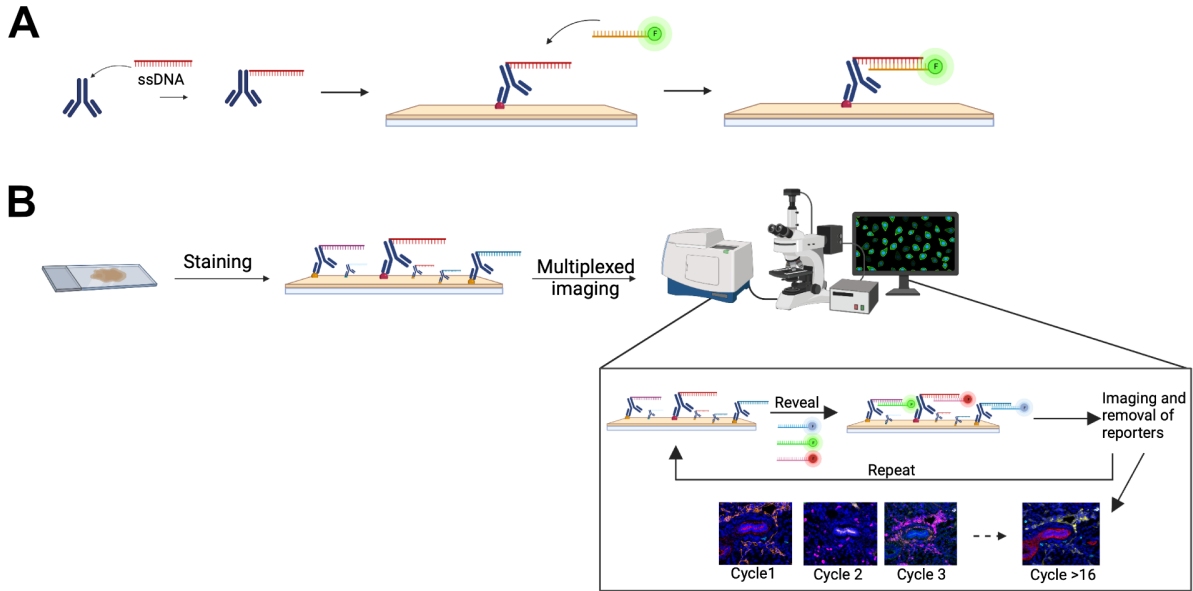

**Supplementary Figure 1. High-parametric tissue imaging workflow.** **A)** Steps of antibody conjugation and conjugation validation. Antibodies were conjugated with single-stranded DNA (ssDNA) and validation of the conjugated antibodies was done with reporters (complementary DNA strands conjugated to fluorophores). **B)** Staining the tissue with conjugated antibodies. During each cycle of the automated image acquisition run, up to three reporters were revealed to visualize up to three different antibodies. After each imaging cycle, the reporters were removed to reveal the next set of reporters. (Created in BioRender. Ayoglu, B. (2022) BioRender.com/1411753)

Week 6

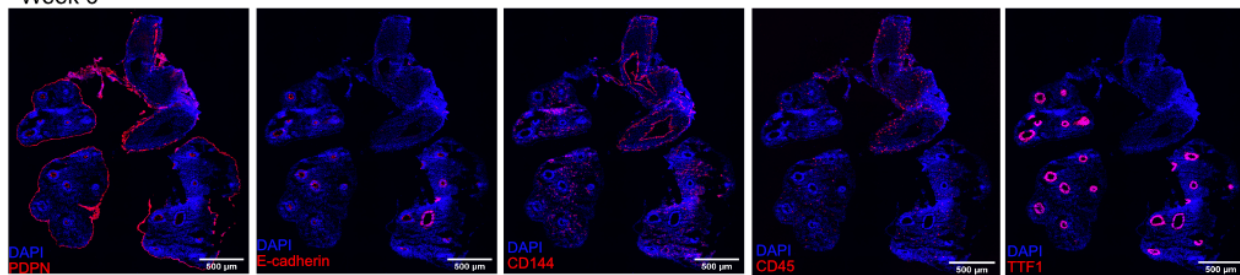

Week 8.5

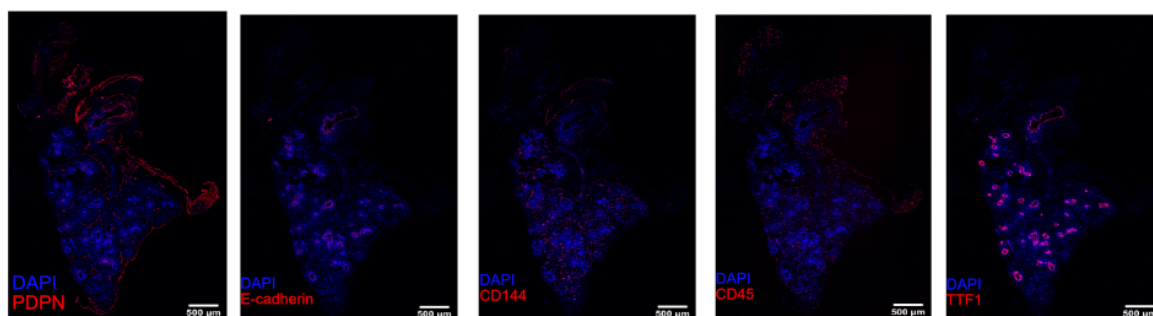

Week 11

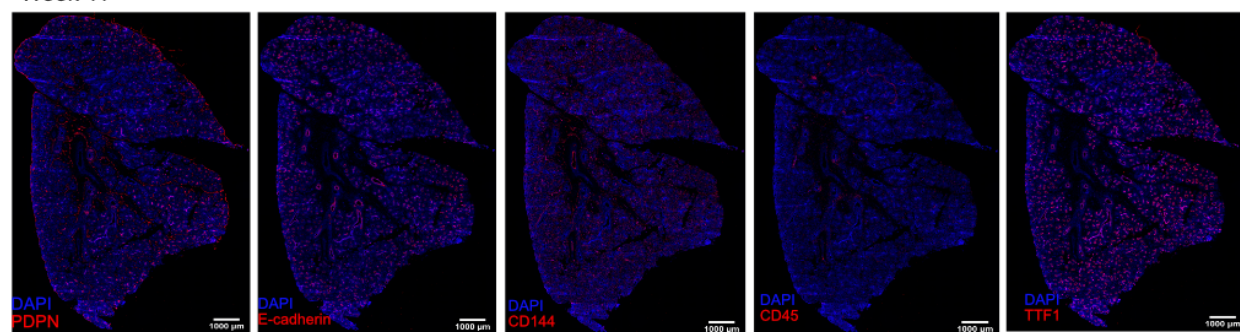

Week 12

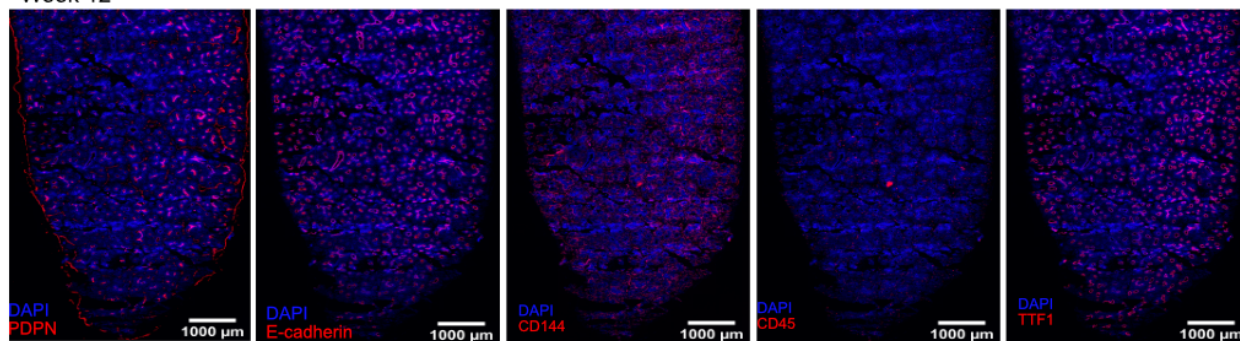

Week 13

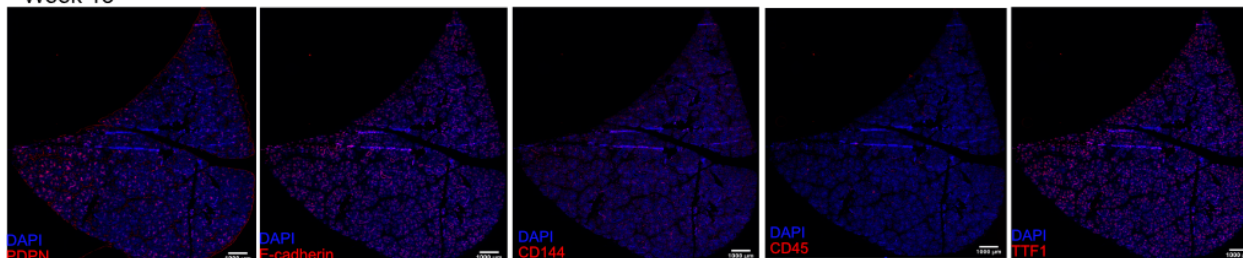

**Supplementary Figure 2. Original imaging area for the lung tissues from different developmental weeks.** Staining patterns of PDPN (lymphatic endothelial and mesothelial marker), CDH1 (E-Cadherin, epithelial marker), CD144 (endothelial marker), CD45 (general immune marker) and TTF1 (epithelial marker) are shown in red on the original imaging area. Images represent a single donor for each developmental week. Scale bar corresponds to 500  $\mu\text{m}$  in weeks 6 and 8.5, and to 1000  $\mu\text{m}$  in weeks 11, 12 and 13.



Week 6

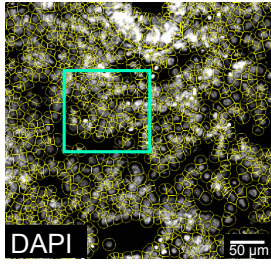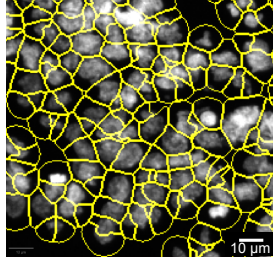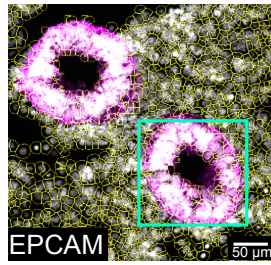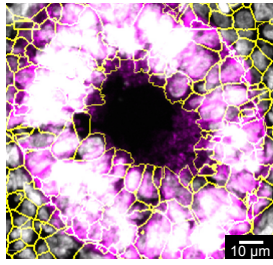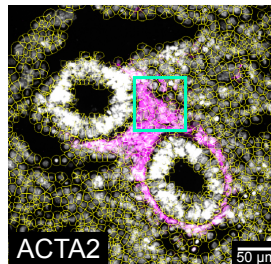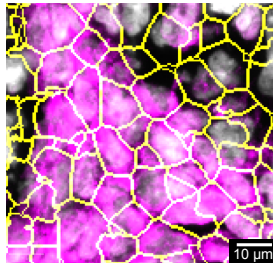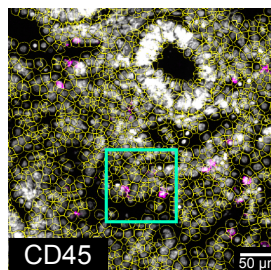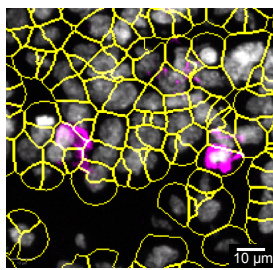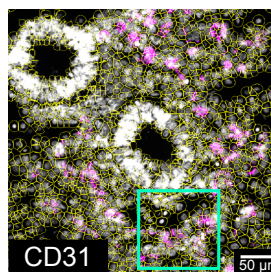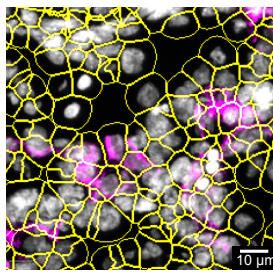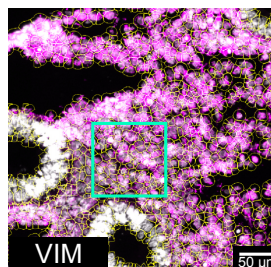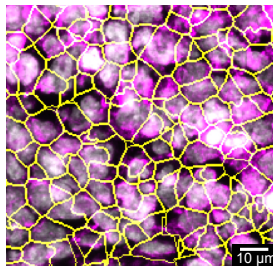

Week 8.5

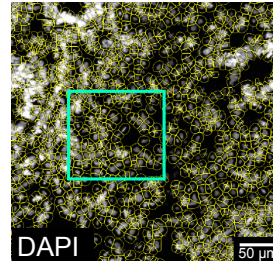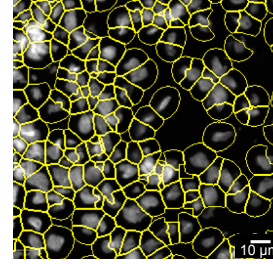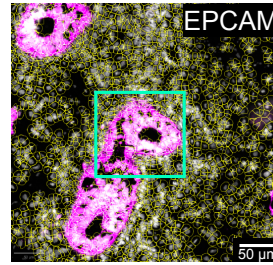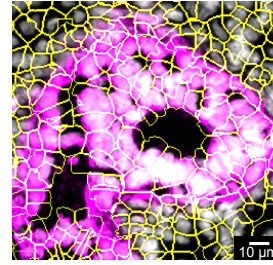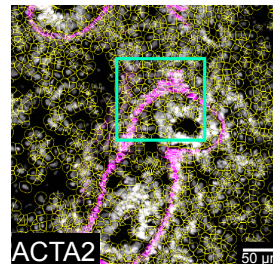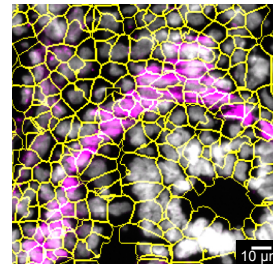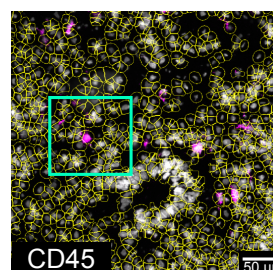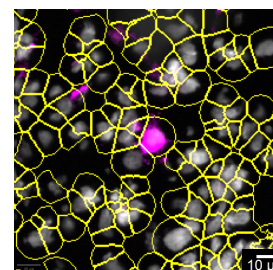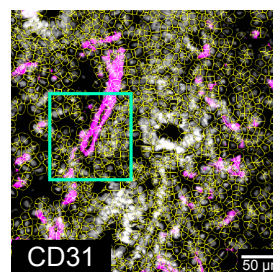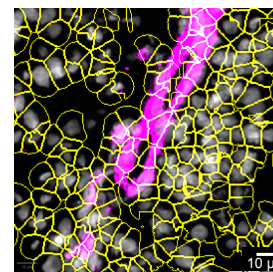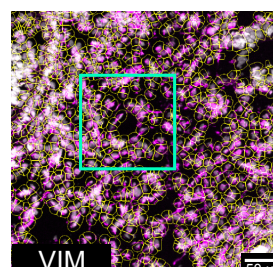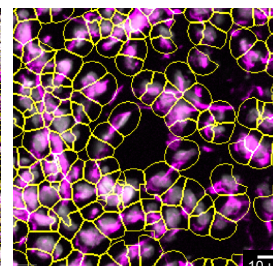



## Week 11

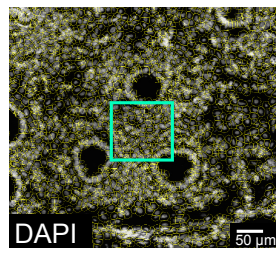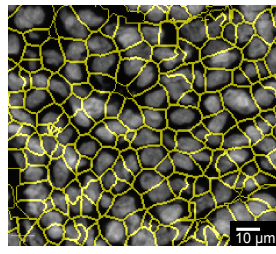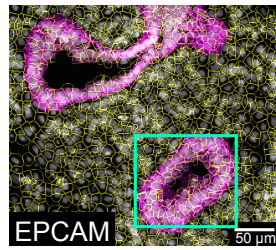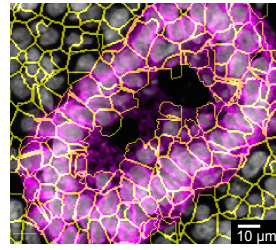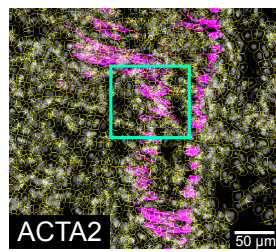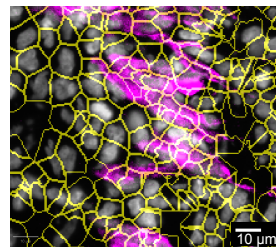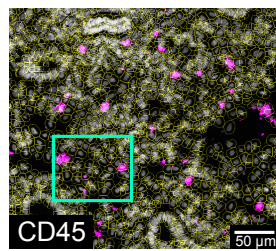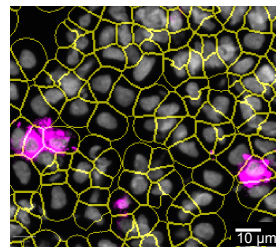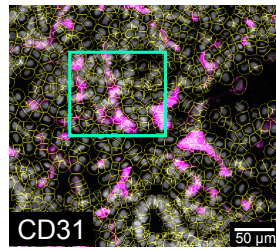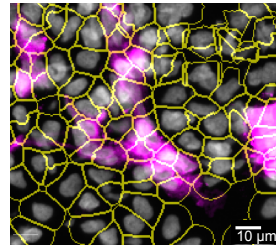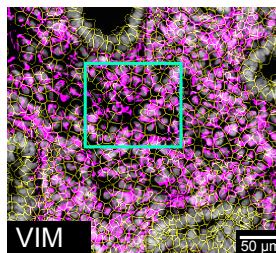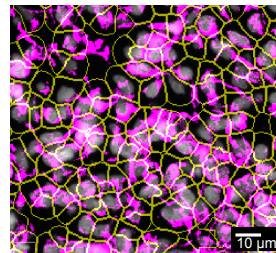

## Week 12

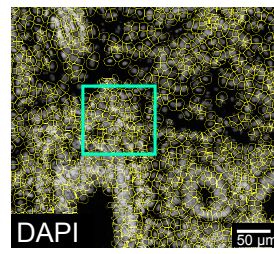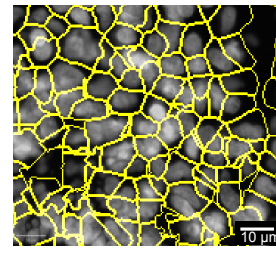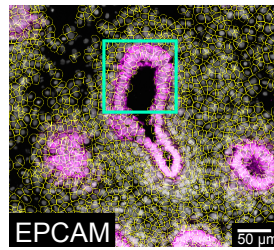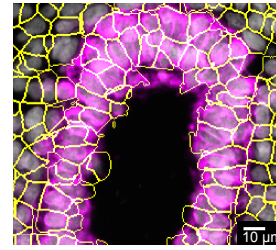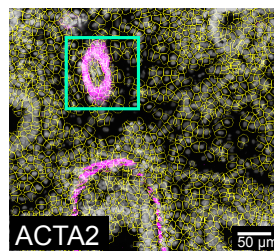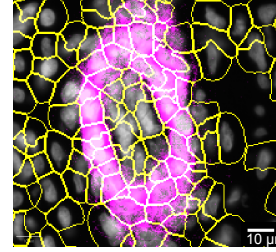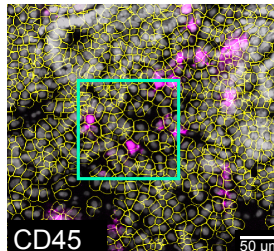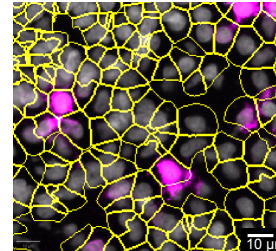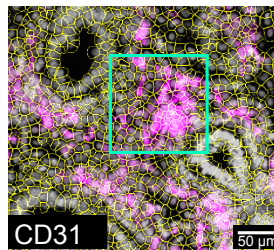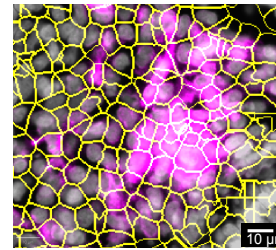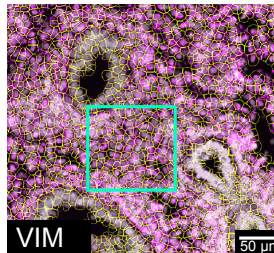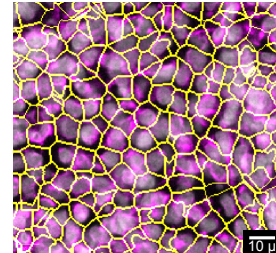



## Week 13

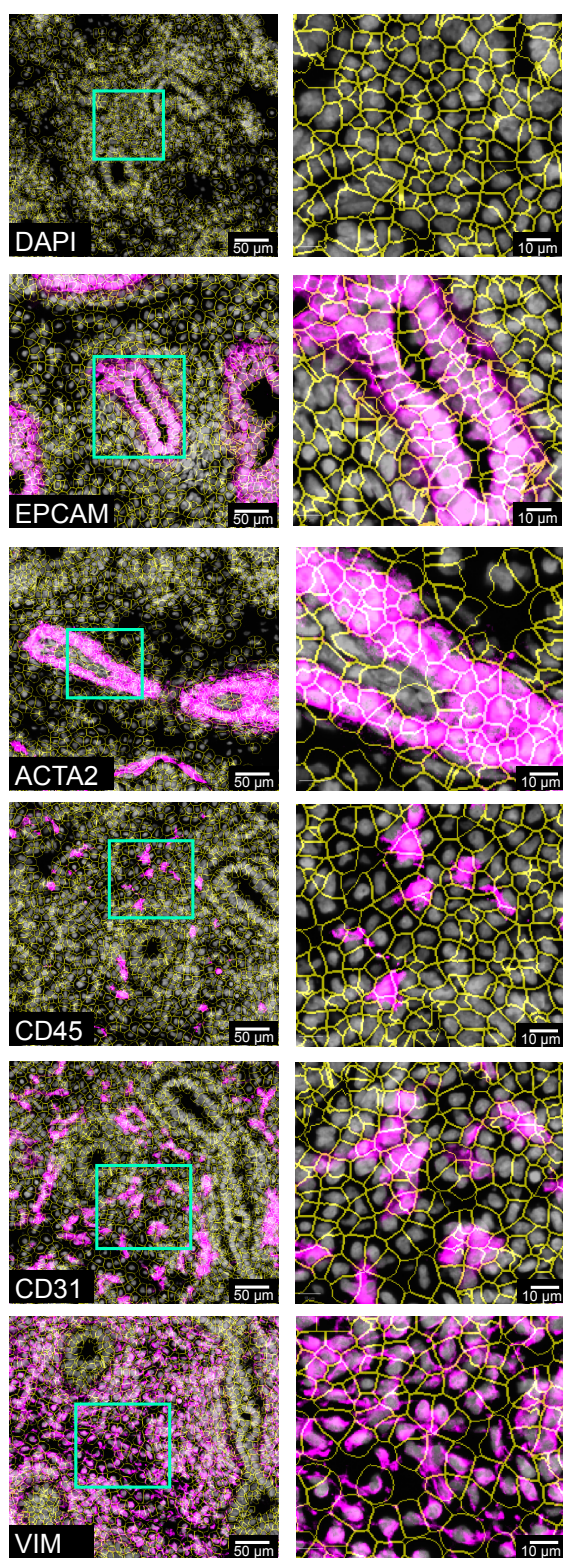

**Supplementary Figure 3. Segmentation of the developing human lung tissue imaging data.** DAPI and EPCAM images were used to create segmentation masks in PIPEX (<https://github.com/CellProfiling/pipex.git>) and the resulting .csv file included the intensities of each

marker, cell ID and coordinates of each segmented cell. For each week, the images in the left column show selected regions to demonstrate the fit of the segmentation mask for DAPI (nuclear marker), EPCAM (epithelial cells), ACTA2 (smooth muscle cells), CD45 (immune cells), CD31 (endothelial cells) and VIM (mesenchymal cells). The images in the right column display zoomed-in views within the green inset boxes. Scale bars correspond to 50  $\mu\text{m}$  in the images on the left side, and to 10  $\mu\text{m}$  in the images on right side for the zoomed-in green boxes. Images represent a single donor for each developmental week.

**A****Area selection in Perseus**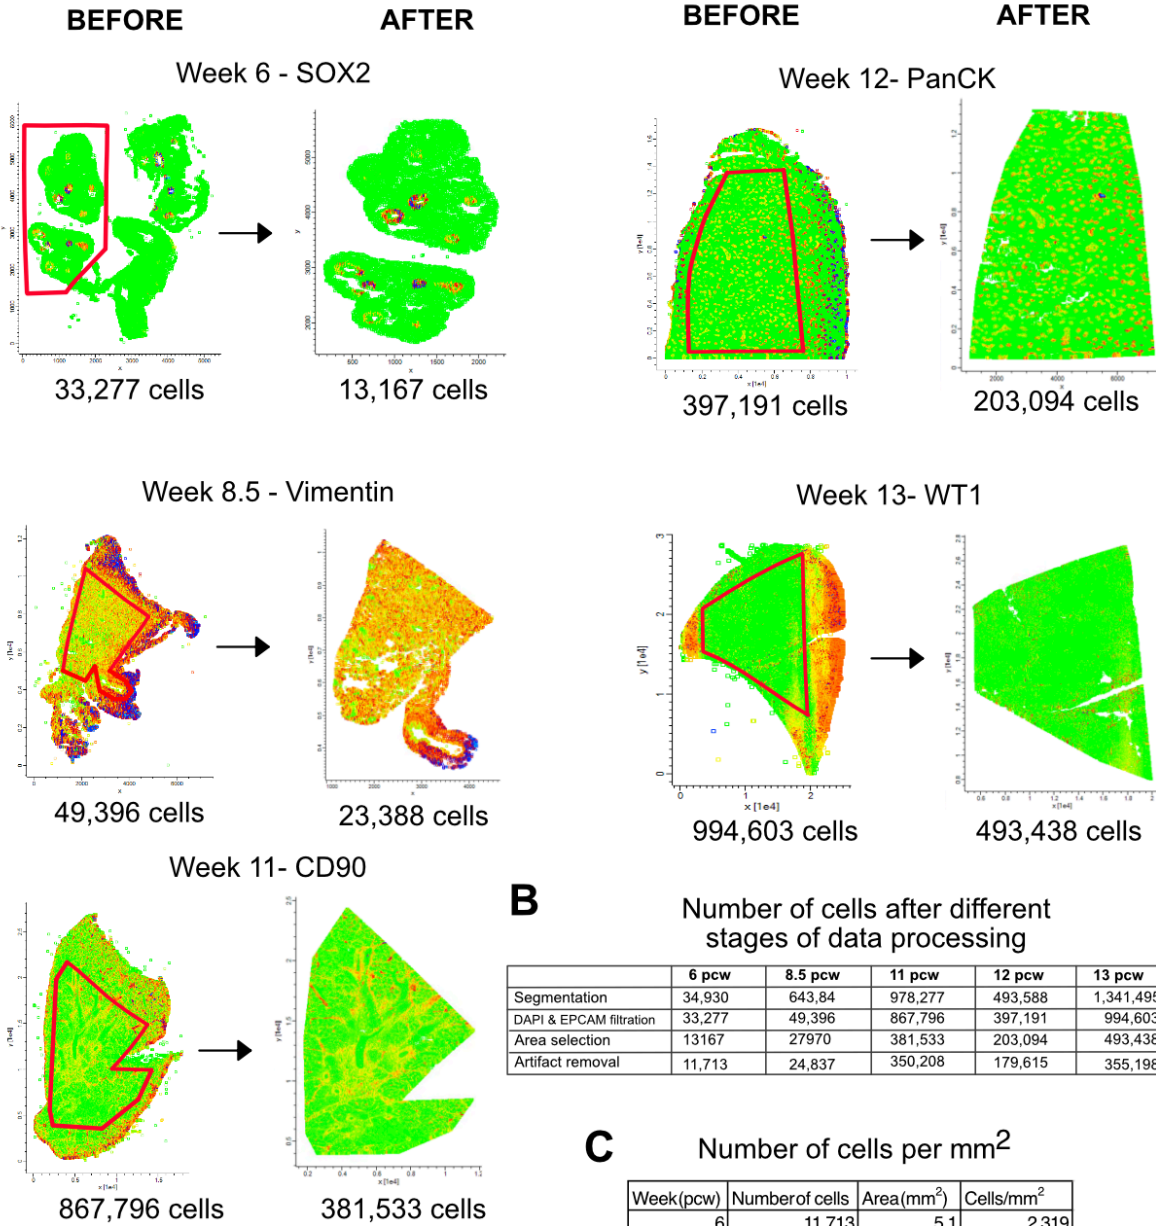**B****Number of cells after different stages of data processing**

|                         | 6 pcw  | 8.5 pcw | 11 pcw  | 12 pcw  | 13 pcw    |
|-------------------------|--------|---------|---------|---------|-----------|
| Segmentation            | 34,930 | 643,84  | 978,277 | 493,588 | 1,341,495 |
| DAPI & EPCAM filtration | 33,277 | 49,396  | 867,796 | 397,191 | 994,603   |
| Area selection          | 13167  | 27970   | 381,533 | 203,094 | 493,438   |
| Artifact removal        | 11,713 | 24,837  | 350,208 | 179,615 | 355,198   |

**C****Number of cells per mm<sup>2</sup>**

| Week(pcw) | Number of cells | Area(mm <sup>2</sup> ) | Cells/mm <sup>2</sup> |
|-----------|-----------------|------------------------|-----------------------|
| 6         | 11,713          | 5.1                    | 2,319                 |
| 8.5       | 24,837          | 10.5                   | 2,373                 |
| 11        | 350,208         | 136.0                  | 2,576                 |
| 12        | 179,615         | 62.8                   | 2,862                 |
| 13        | 355,198         | 132.1                  | 2,690                 |
|           |                 | Average                | 2,564                 |

**Supplementary Figure 4. Selection of developing human lung tissue regions for downstream analysis.** A) Tissues were visualized back on the tissue plane as scatterplots according to the x and y coordinates of each cell. Using Perseus<sup>2</sup>, different markers were selected for visualization of tissue at each week to examine the areas for potential imaging artifacts. On the scatter plots, green color indicates low expression and red color indicates high expression of the corresponding markers. For week 6 and 8.5, the areas not belonging to the lung tissue were excluded. For week 11, 12 and 13,

the edges of the tissue with artifacts were excluded. Red polygons indicate the regions selected in Perseus for the downstream analysis. Below each scatter plot, number of cells before and after area exclusion are indicated. **B)** Number of resulting cells after different stages of image and data processing: Segmentation, DAPI and EPCAM marker intensity filtration, area selection in Perseus and artifact removal after clustering. **C)** Calculated number of cells per unit area at different weeks, where the area corresponds to the selected polygons shown in panel **(A)**.

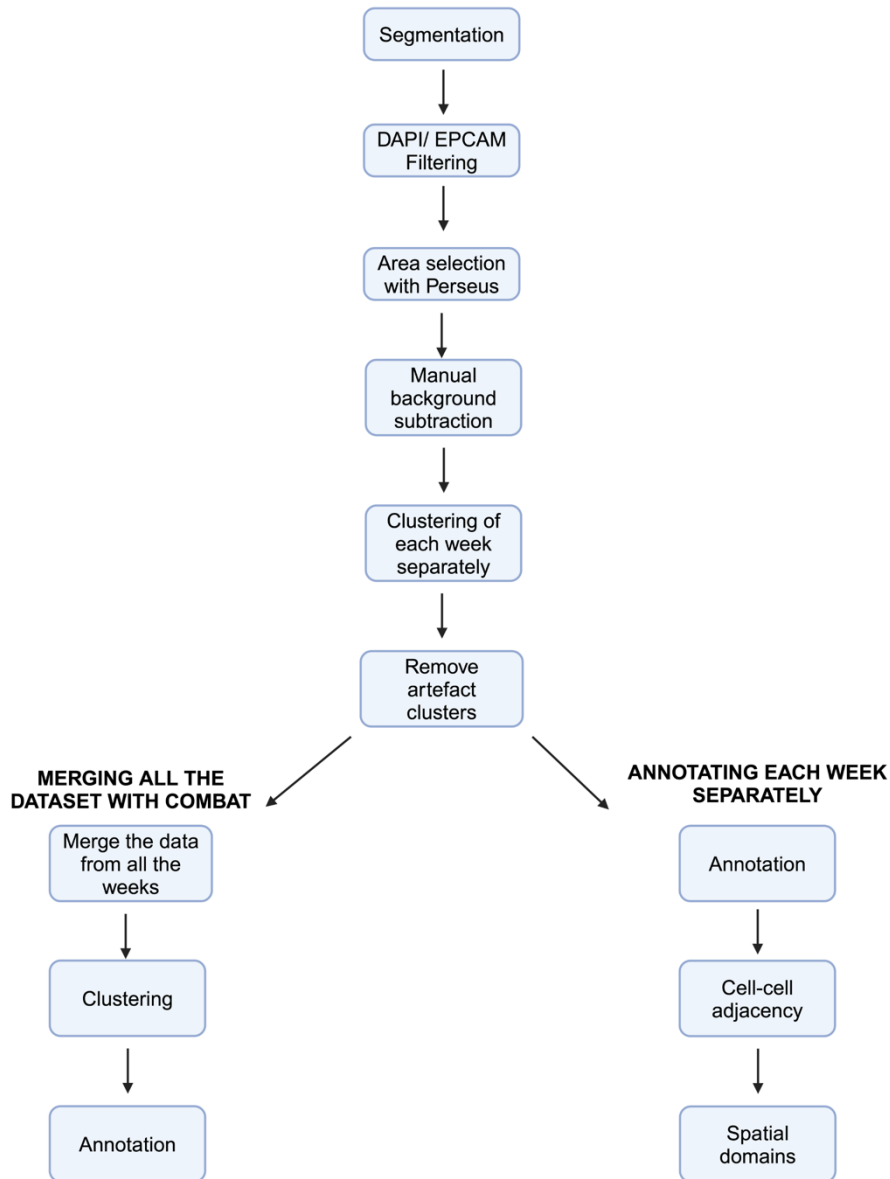

**Supplementary Figure 5. Flowchart summarizing the main steps of imaging data processing and downstream analysis.** Following image segmentation and intensity filtration for DAPI and EPCAM markers, artifact-free polygon areas were selected for each tissue using Perseus<sup>2</sup>. For each marker, background subtraction was performed. To identify and remove remaining artifact regions, data for each week was clustered separately and clusters annotated as artifacts were removed. Data from each week was then merged using ComBat<sup>3</sup> and the merged dataset was clustered and annotated to gain a global insight into the main cell types. Finally, clusters identified in each individual week were annotated for a more detailed analysis of cell types and subtypes and for a downstream analysis of cell type adjacency patterns and spatial domains in individual timepoints.

## UMAP clusters before artifact removal

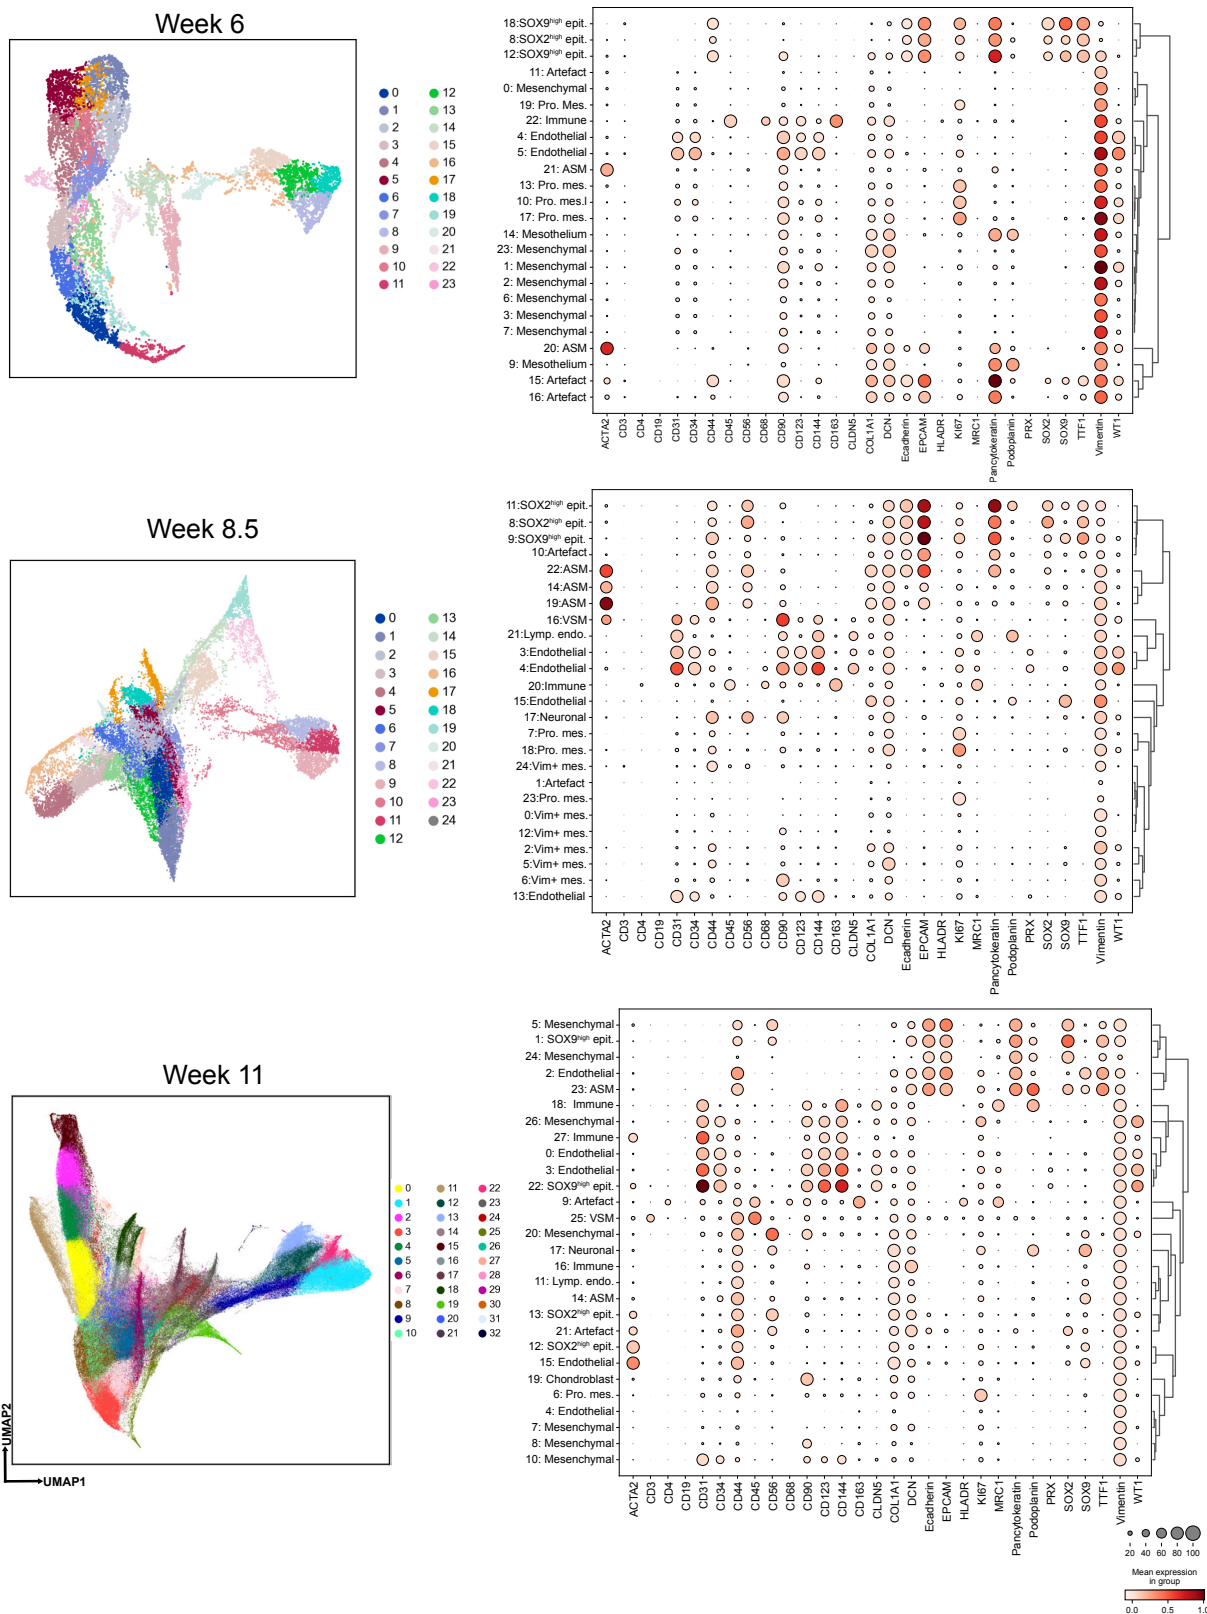



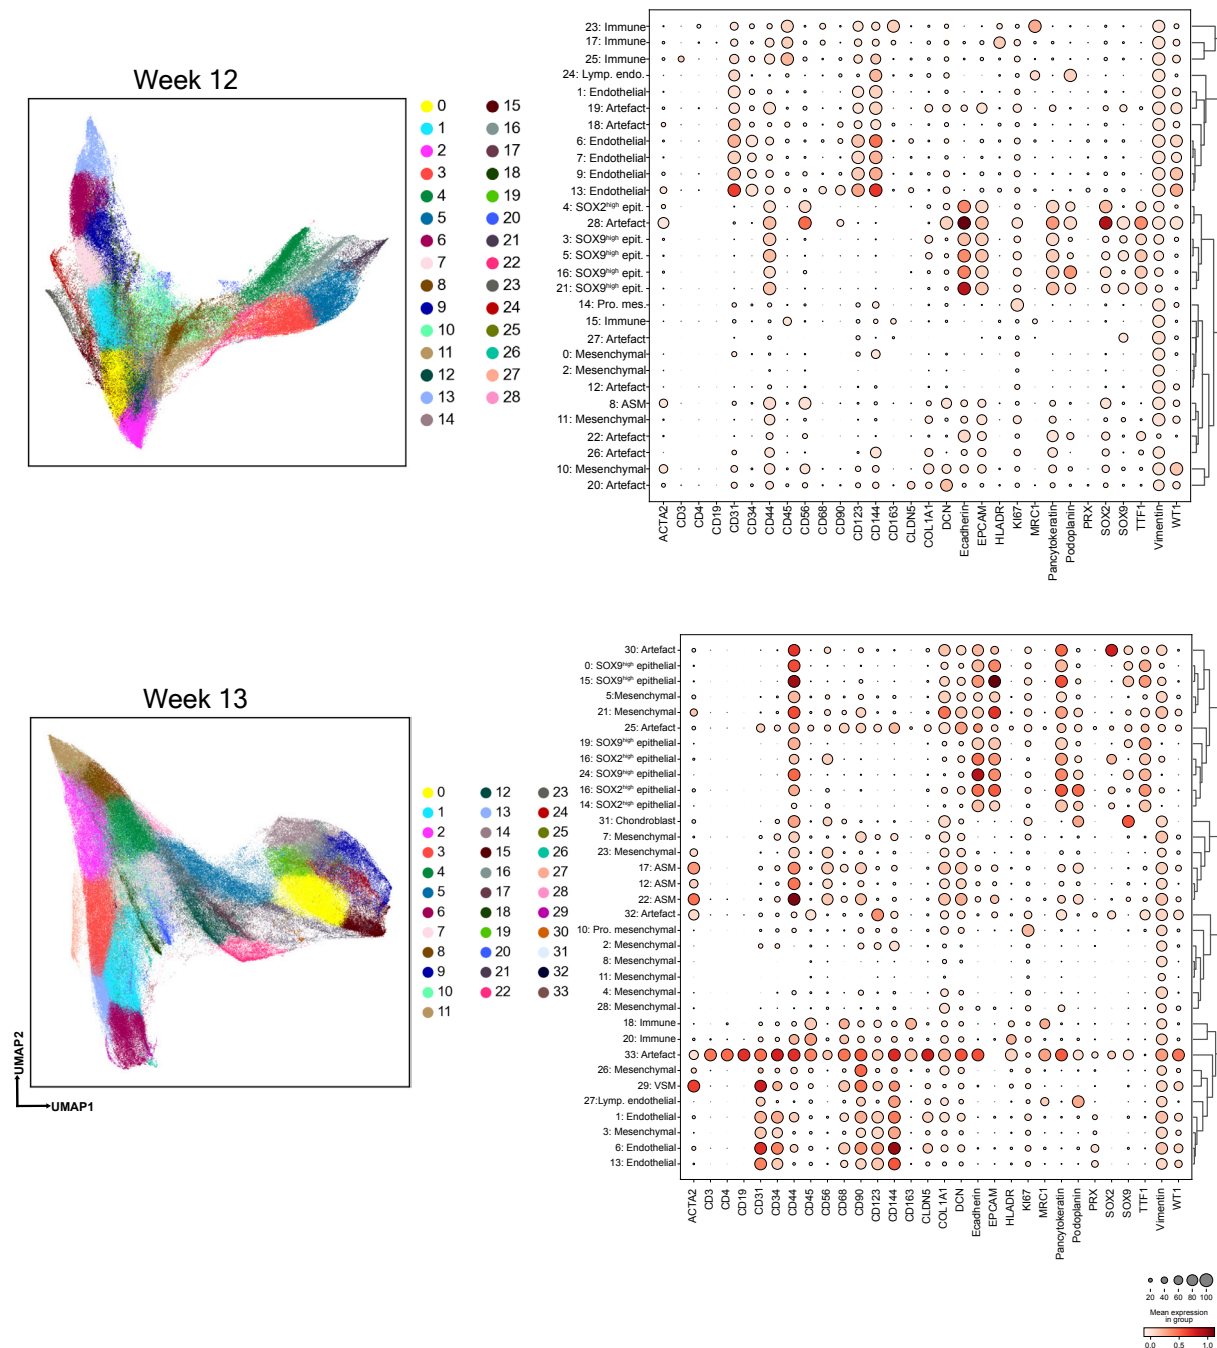

**Supplementary Figure 6. Cluster annotations for developing human lung samples at different weeks before the removal of clusters with artifacts.** UMAP plots on the left side show all clusters identified and dotplots show average marker expressions in these clusters, at each week. The size of the circles indicates the percentage of cells expressing the marker in each cluster, where dark red color indicates high and white color indicates low expression.



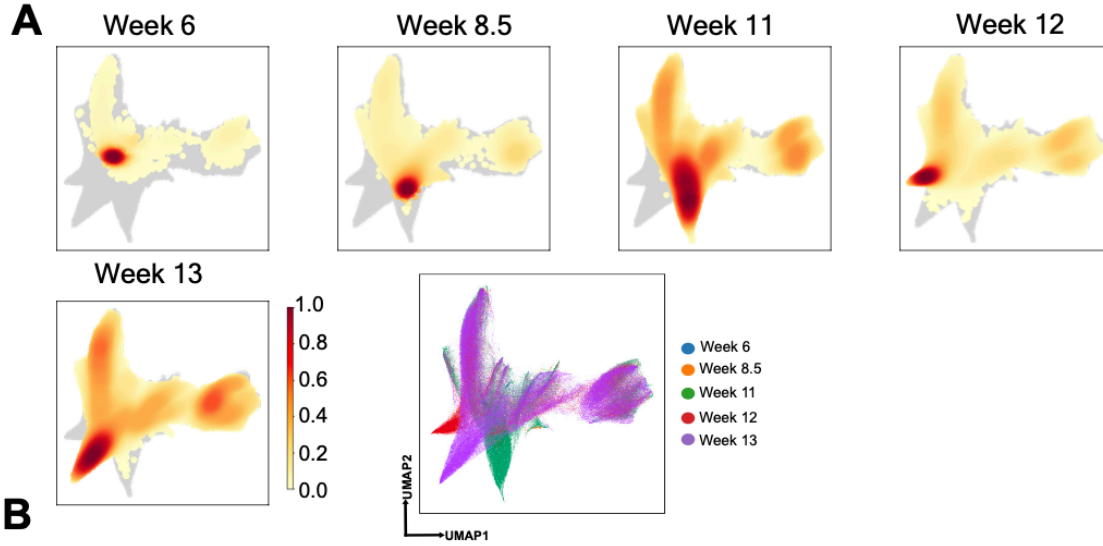

**B**

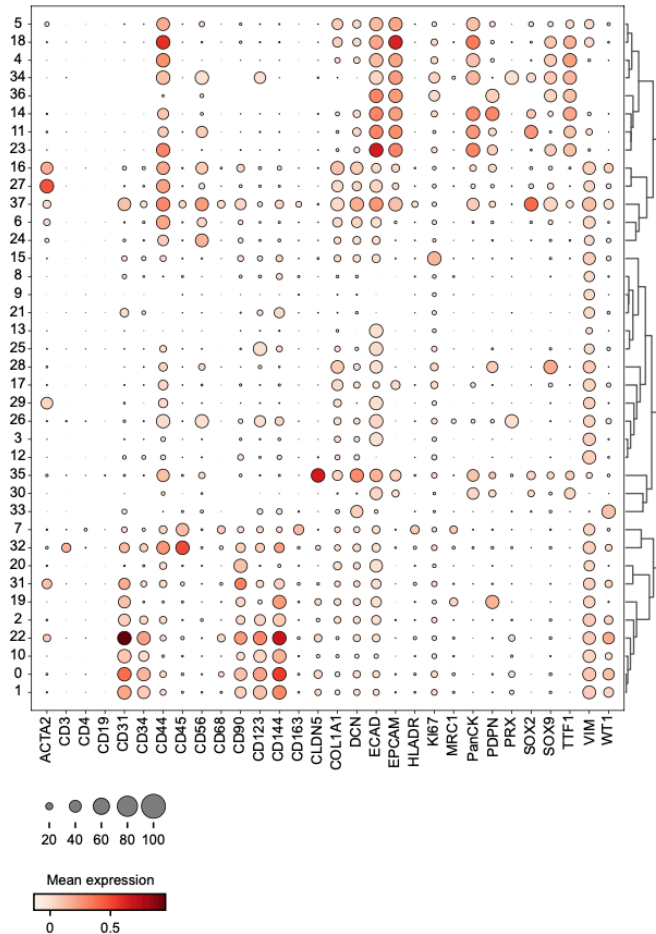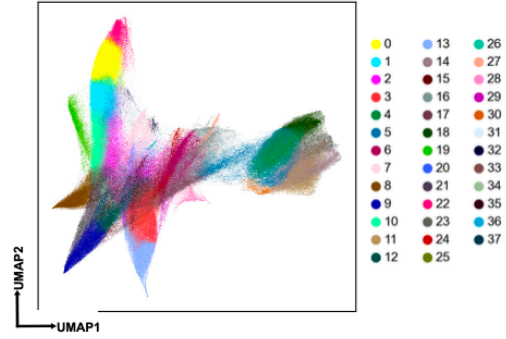

- |                                      |                                      |
|--------------------------------------|--------------------------------------|
| 0 : Endothelial                      | 22 : Endothelial                     |
| 1 : Endothelial                      | 23 : SOX9 <sup>high</sup> epithelial |
| 2 : Endothelial                      | 24 : Neuronal                        |
| 3 : Mesenchymal                      | 25 : Mesenchymal                     |
| 4 : SOX9 <sup>high</sup> epithelial  | 26 : Mesenchymal                     |
| 5 : SOX2 <sup>high</sup> epithelial  | 27 : ASM                             |
| 6 : ASM                              | 28 : Chondroblast                    |
| 7 : Immune                           | 29 : VSM                             |
| 8 : Mesenchymal                      | 30 : SOX9 <sup>high</sup> epithelial |
| 9 : Mesenchymal                      | 31 : VSM                             |
| 10 : Endothelial                     | 32 : Immune                          |
| 11 : SOX2 <sup>high</sup> epithelial | 33 : Mesenchymal                     |
| 12 : Mesenchymal                     | 34 : SOX9 <sup>high</sup> epithelial |
| 13 : Mesenchymal                     | 35 : Mesenchymal                     |
| 14 : SOX2 <sup>high</sup> epithelial | 36 : SOX9 <sup>high</sup> epithelial |
| 15 : Ki67+ mesenchymal               | 37 : Mesenchymal                     |
| 16 : ASM                             |                                      |
| 17 : Mesenchymal                     |                                      |
| 18 : SOX9 <sup>high</sup> epithelial |                                      |
| 19 : Lymphatic endothelial           |                                      |
| 20 : Mesenchymal                     |                                      |
| 21 : Mesenchymal                     |                                      |

**Supplementary Figure 7. Clustering of data merged from developing human lung samples at all analyzed weeks.** **A)** Density plots embedded on UMAP plots show the distribution of clusters belonging to different weeks. High density is indicated with dark red color and low intensity is indicated with light yellow color. Below, UMAP plot of the merged data is shown where blue corresponds to data points from week 6, orange to week 8.5, green to week 11, red to week 12 and purple to week 13. **B)** Dotplot in the left panel shows the average marker expression in merged data. The size of the circles indicates the percentage of cells expressing the marker in each cluster, where dark red color indicates high and white color indicates low expression. In the lower panel, annotations of each cluster of the merged data are provided.

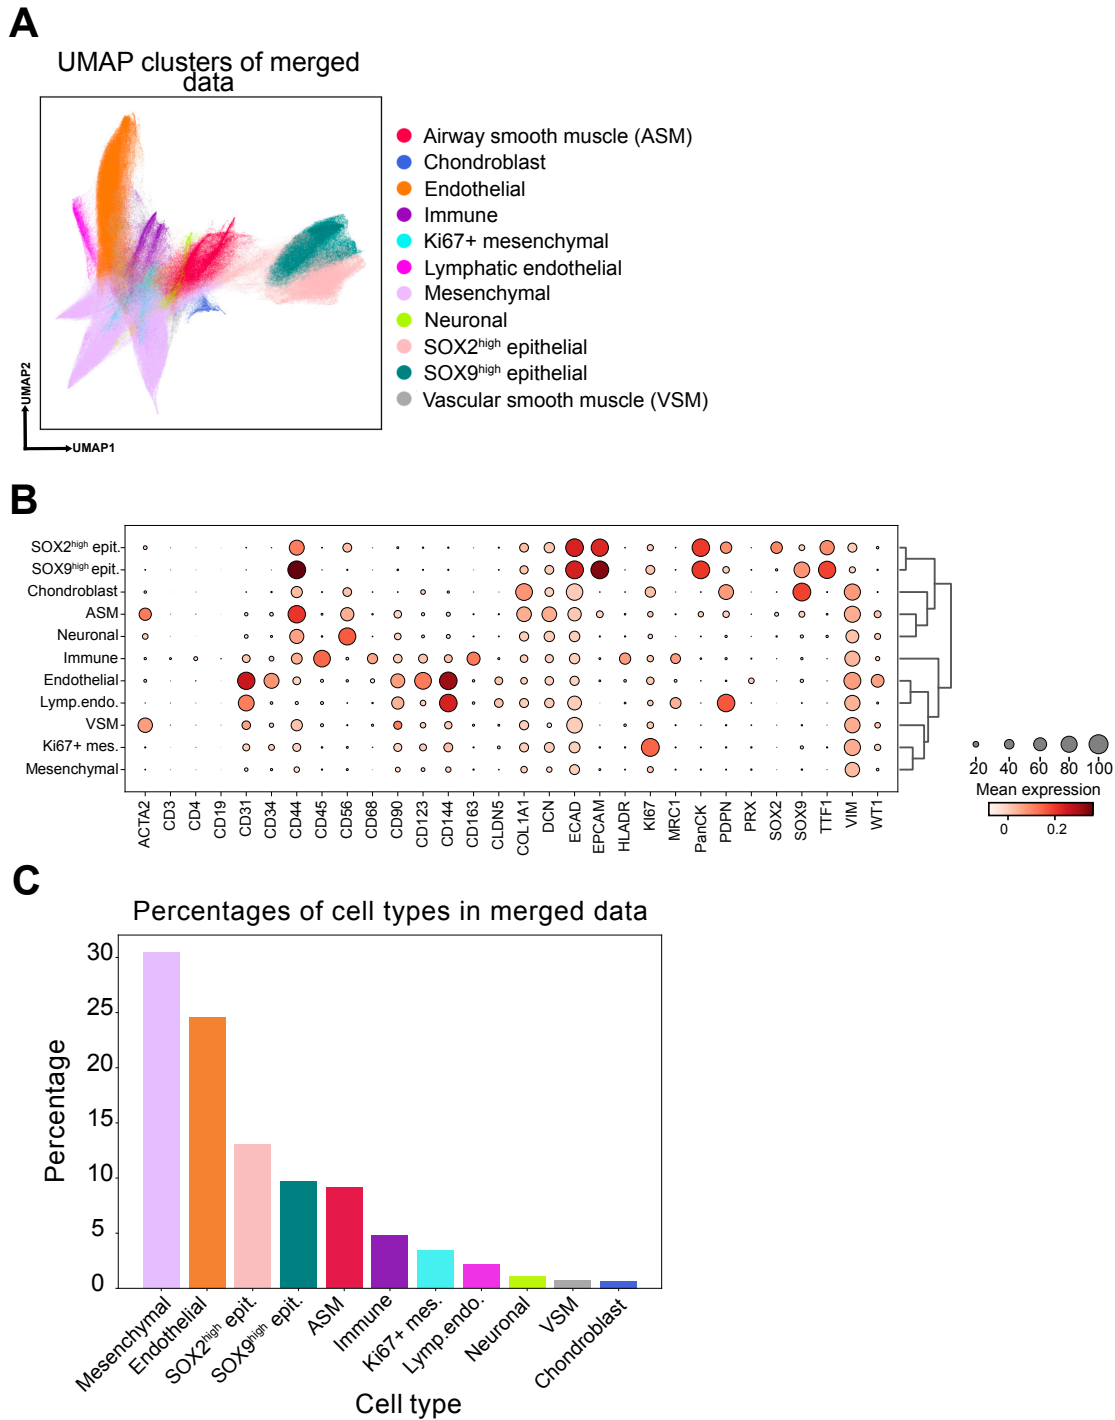

**Supplementary Figure 8. Clustering of merged human lung data across all developmental weeks.** **A)** Annotated cell type clusters visualized on the UMAP plot. The x-axis shows UMAP1 and the y-axis shows UMAP2. **B)** Dot plot shows the average marker expression across annotated cell type clusters. The size of the circles indicates the fraction of cells expressing the marker in each cluster. Dark red color indicates high and white color indicates low expression. **C)** Percentage of

different cell types annotated in the merged data. Source data for this figure is provided within the Source Data file.

# UMAP clusters after artifact removal

Week 6

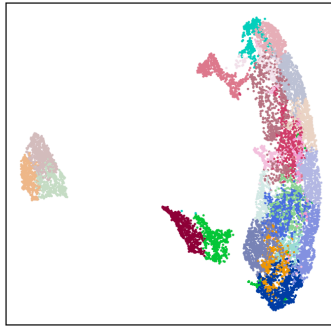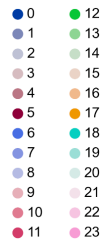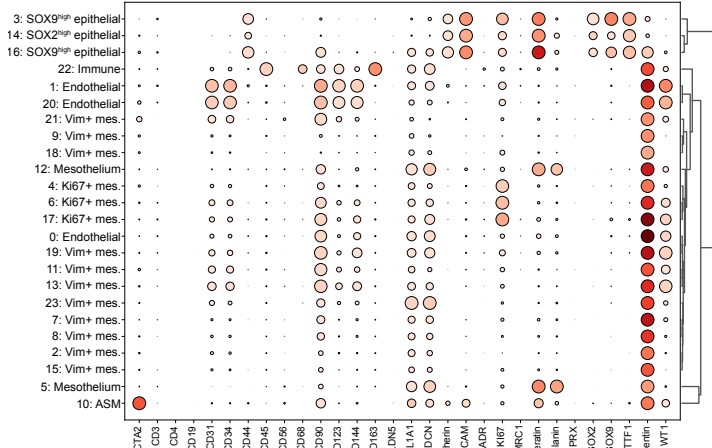

Week 8.5

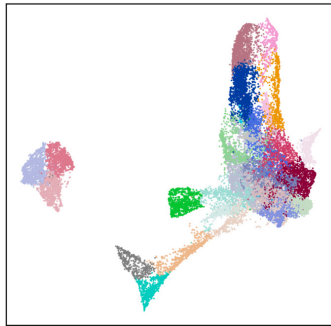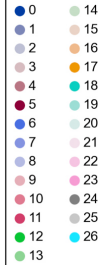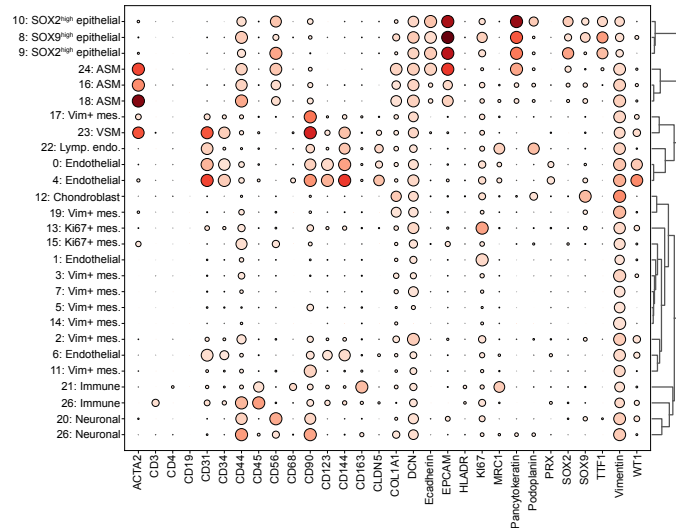

Week 11

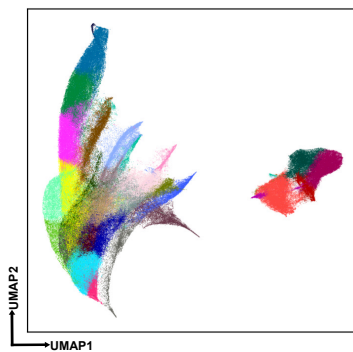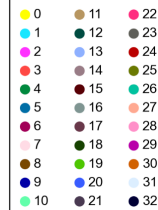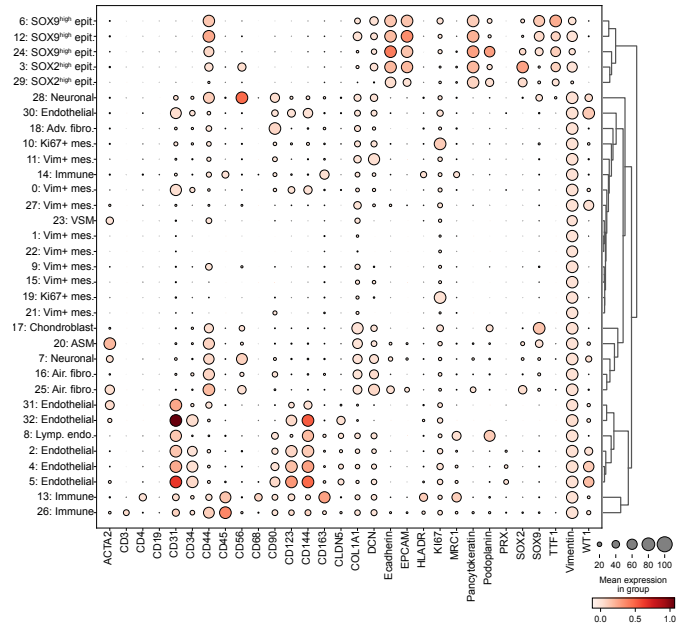

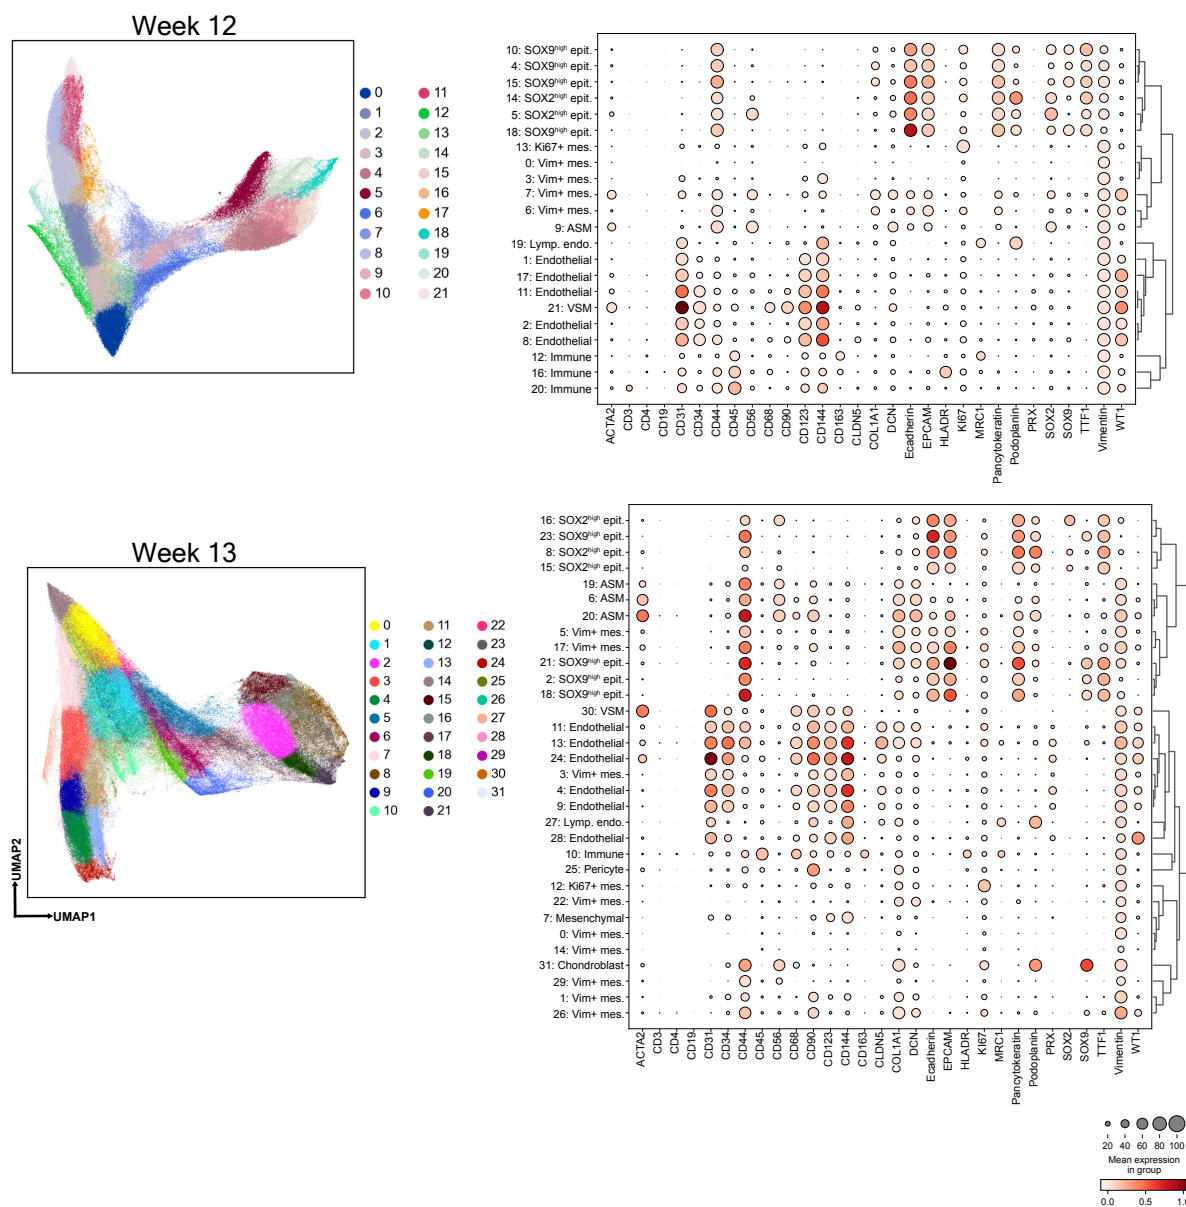

**Supplementary Figure 9. Cluster annotations for developing human lung samples at different weeks after removal of clusters with artifacts.** On the left panel, all the clusters after artifact removal are shown on the UMAP plots at each week. Dotplots to the right show average marker expression in each cluster. The size of the circles indicates the fraction of cells expressing the marker in each cluster, where dark red color indicates high and white color indicates low expression.

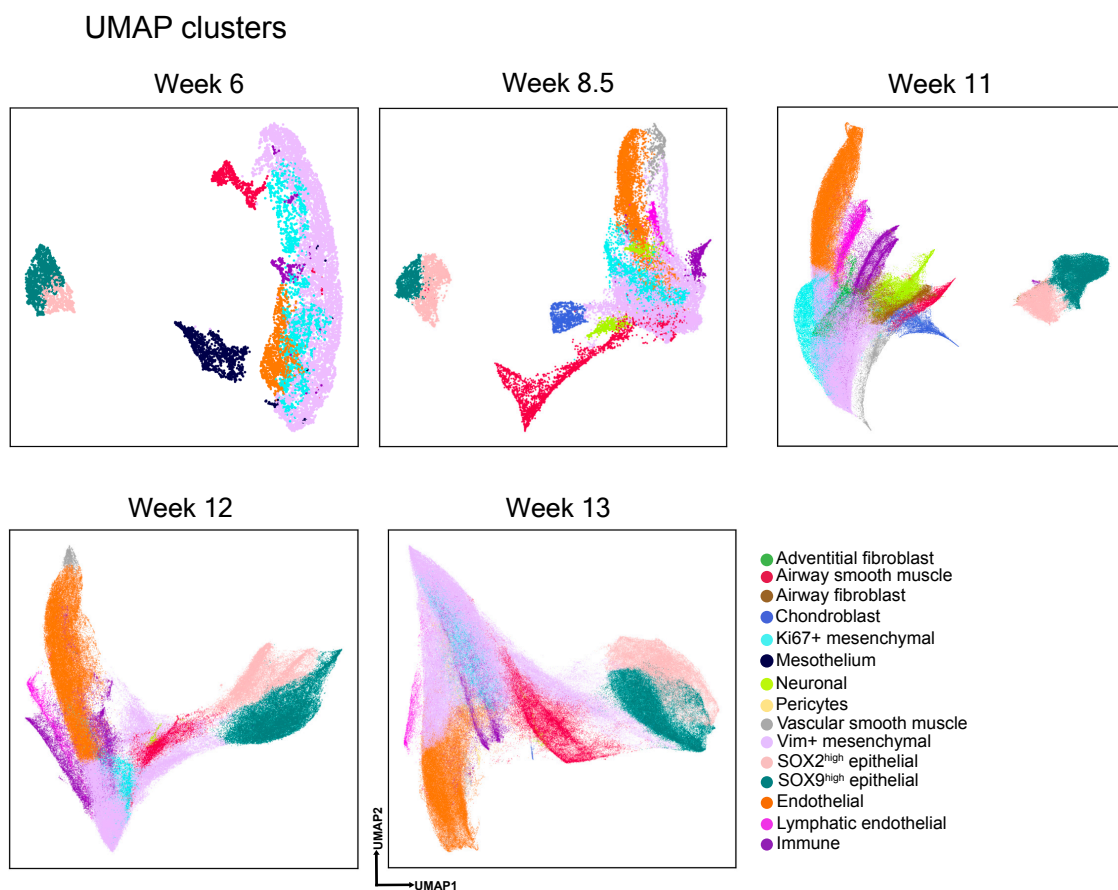

**Supplementary Figure 10. Cluster annotations for developing human lung samples at different weeks.** Clusters belonging to the same cell type were merged and plotted on UMAP embedding. Annotations of all identified clusters, represented with different colors, are provided.

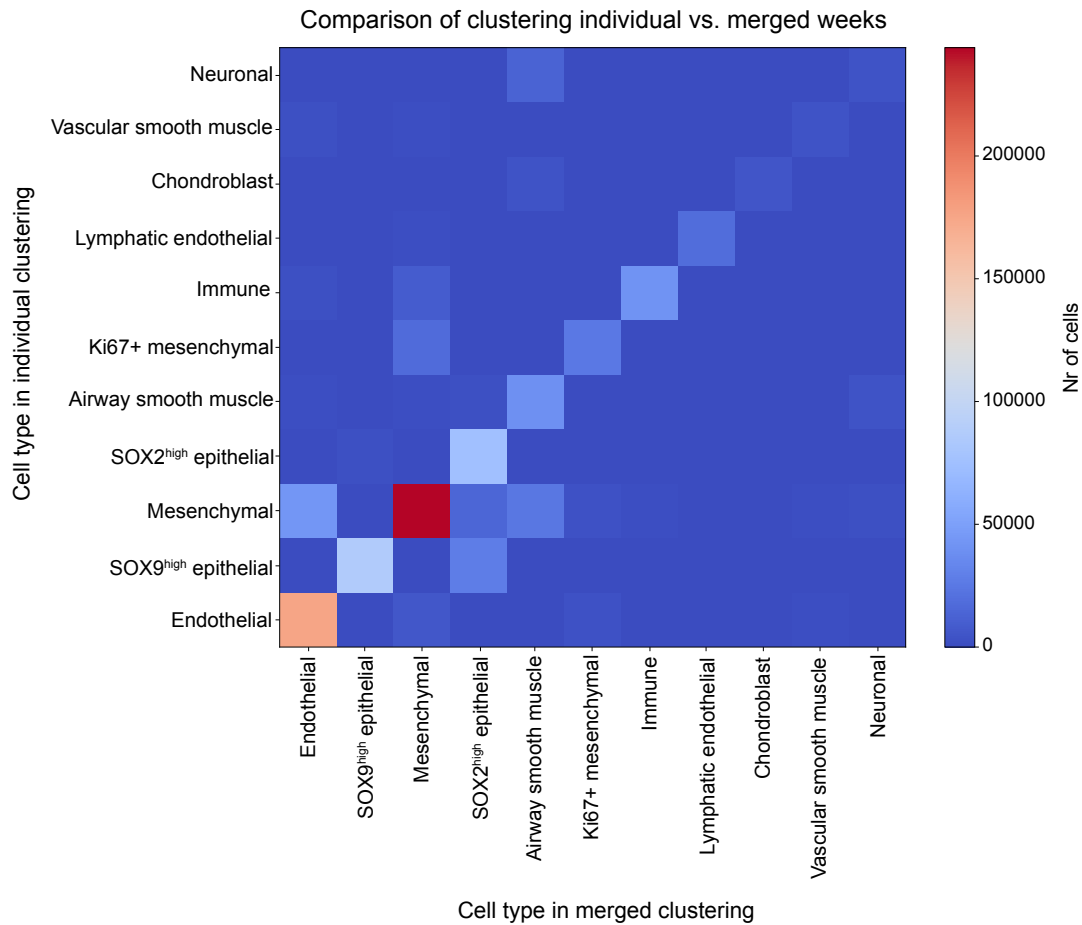

**Supplementary Figure 11. Comparison of the assigned cell type annotations in developing human lung tissue as the outcome of clustering individual versus merged timepoints.** The heatmap summarizes the count of cells assigned to one of the eleven cell types for individual and merged clustering of timepoints. While the majority (78%) of the cell type assignments were consistent, discrepancies existed in the assignment of certain cell types such as SOX2<sup>high</sup> epithelial cells, immune cells and airway smooth muscle cells.



### Endothelial and lymphatic endothelial structures

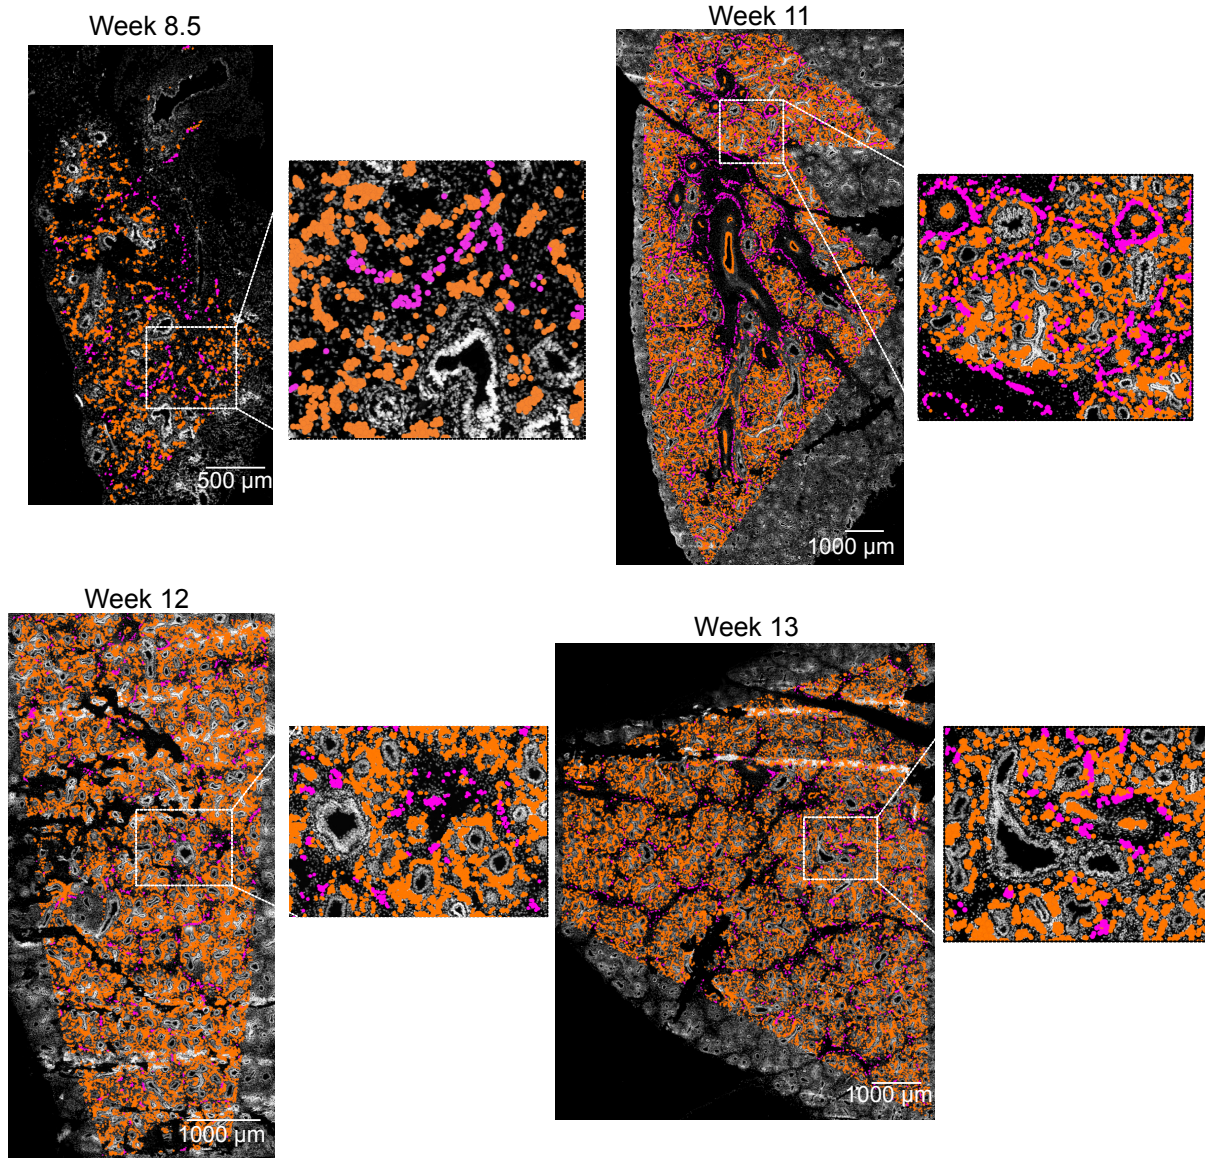

**Supplementary Figure 12. Endothelial and lymphatic endothelial structures in developing human lung.** Clusters annotated as “endothelial” (dark orange) and “lymphatic endothelial” (magenta) overlaid on DAPI channel images for each week. Images represent a single donor for each developmental week. Scale bars correspond to 500 μm for week 8.5, and 1,000 μm for weeks 11, 12 and 13.



**Supplementary Figure 13. Marker correlations in developing human lung samples at different weeks.** Pearson correlation coefficients are plotted in heatmaps, where Pearson's  $r=1$  corresponds to white and  $r=-0.5$  corresponds to black.

## Cellular adjacency

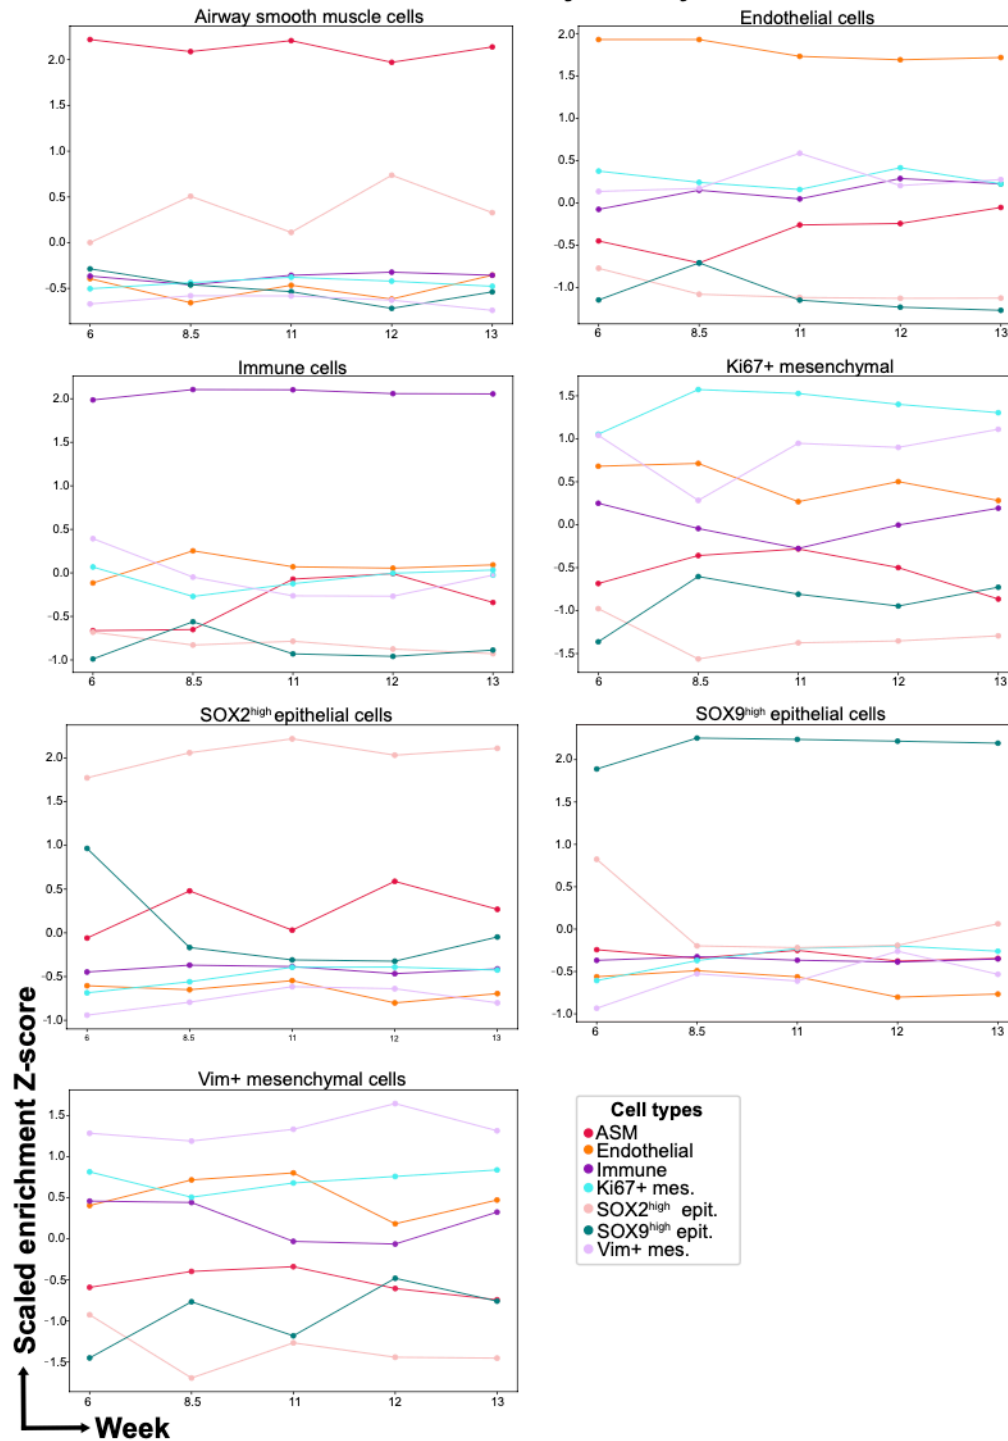

**Supplementary Figure 14. Temporal changes of scaled neighborhood enrichment Z-scores for the main cell types of developing human lung.** Each lineplot summarizes the temporal change of scaled enrichment Z-score for each main cell type for neighboring their own, or the rest of the other cell types, where each line represents one of the seven main cell types in developing human lung. Source data for this figure is provided within the Source Data file.

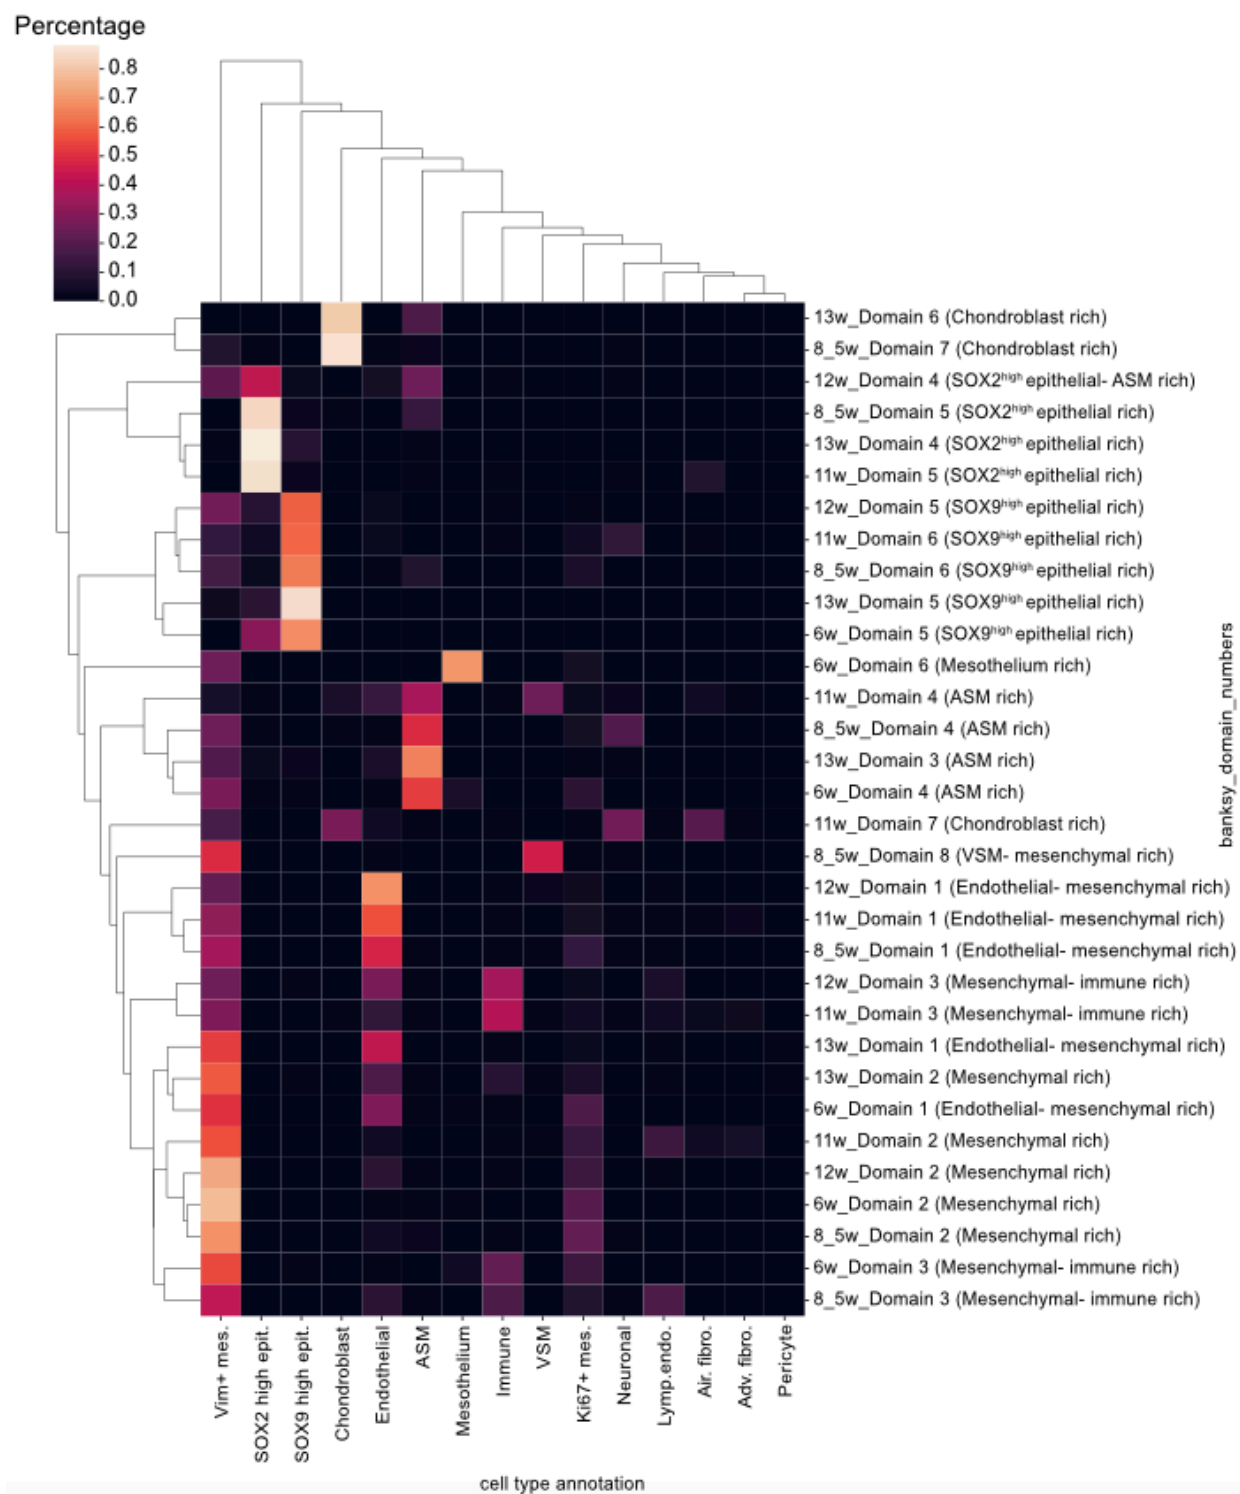

**Supplementary Figure 15. Hierarchical clustering of the cell type composition across all individual spatial domains identified in the developing human lung at different weeks. The color scale indicates the percentage of each cell type within a domain.**

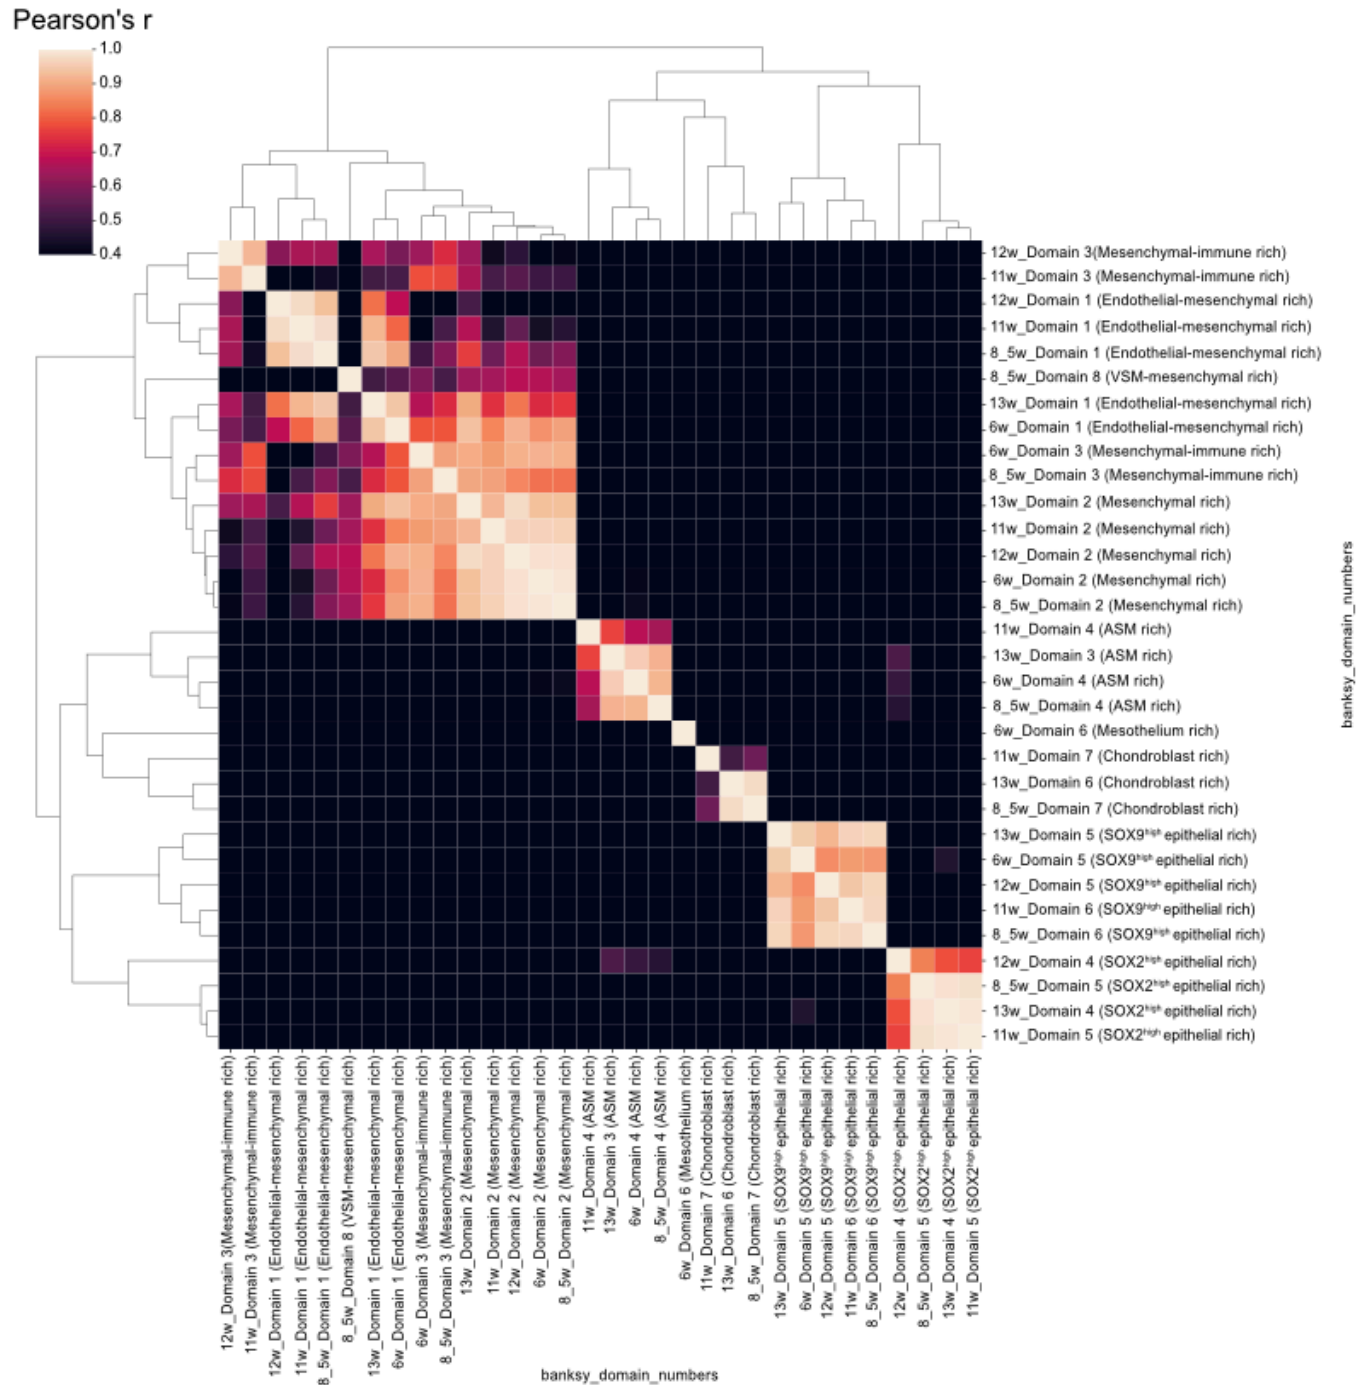

**Supplementary Figure 16. Hierarchical clustering of the correlation among all the individual spatial domains identified in the developing human lung at different weeks. The color scale indicates Pearson correlation coefficient  $r$ .**



### Proliferating airway smooth muscle

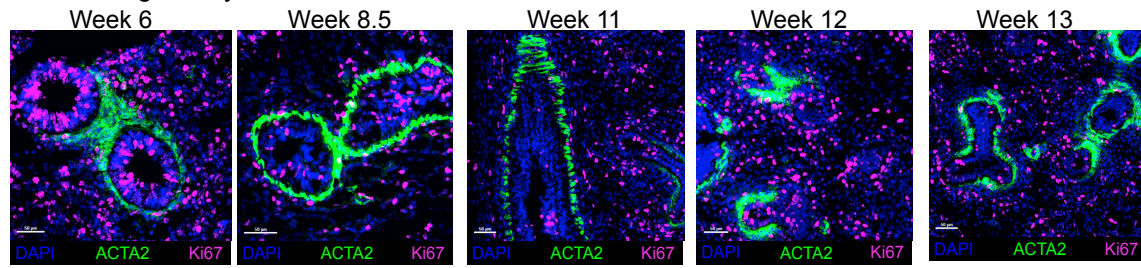

### Proliferating endothelial

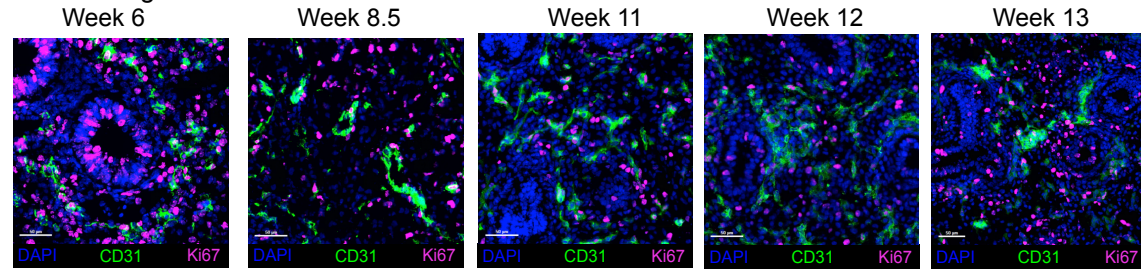

### Proliferating vascular smooth muscle

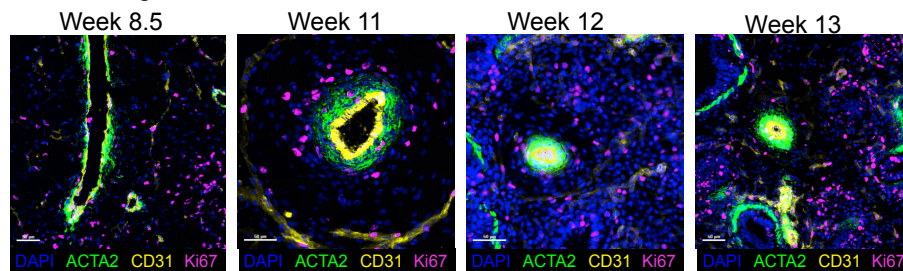

### Proliferating mesenchymal

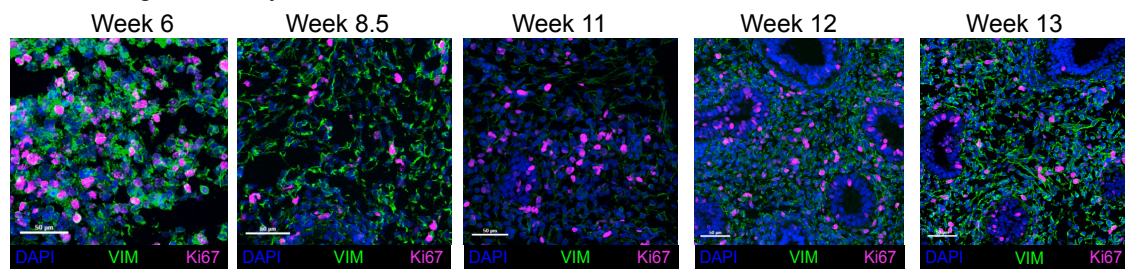

### Proliferating lymphatic endothelial

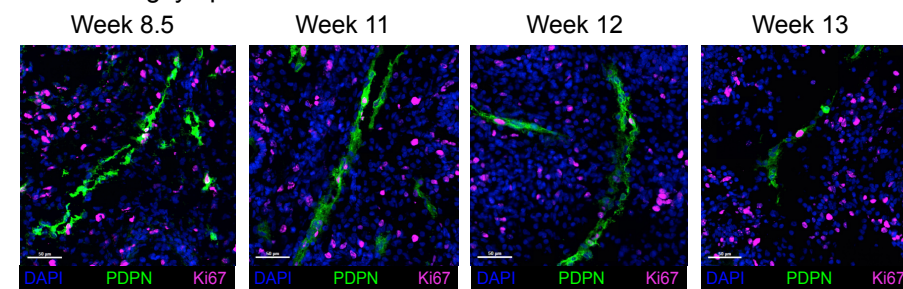

### Proliferating immune

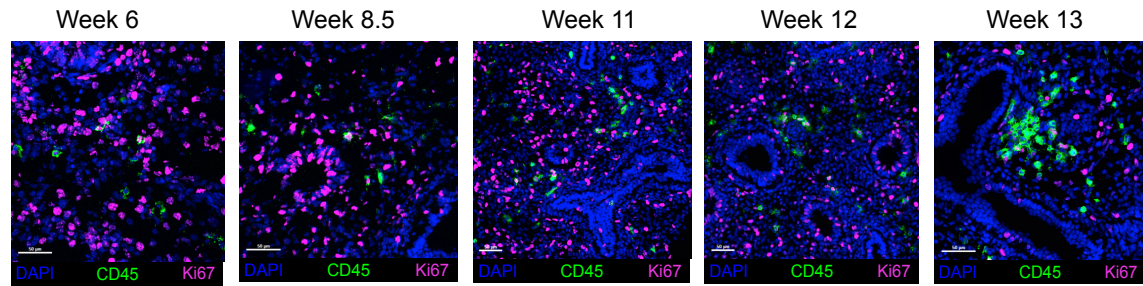

### Proliferating SOX2<sup>high</sup> epithelial

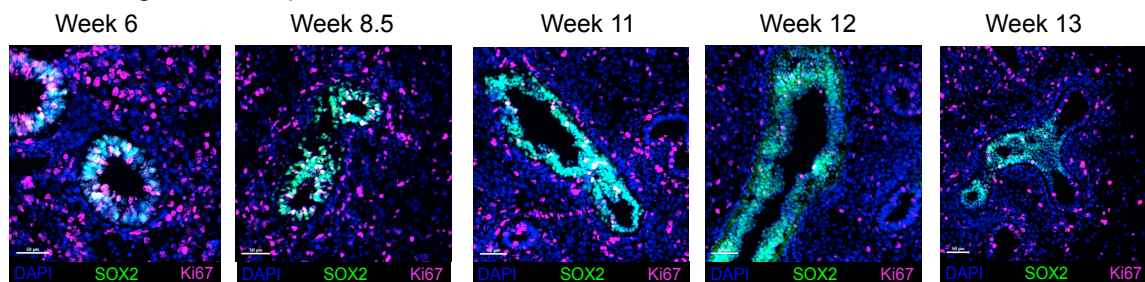

### Proliferating SOX9<sup>high</sup> epithelial

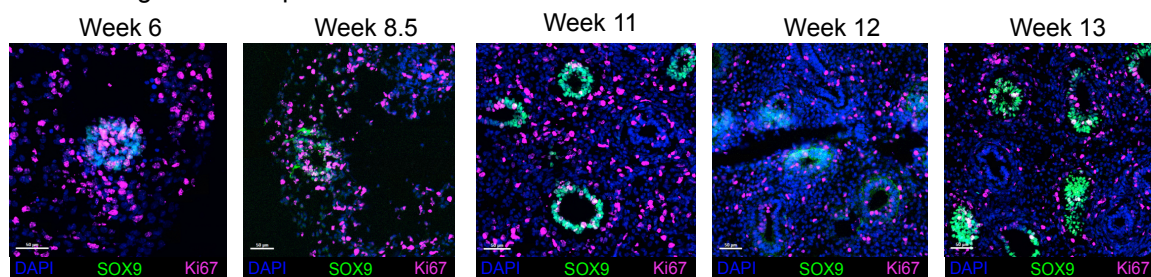

**Supplementary Figure 17. Expression patterns of Ki67 across the main cell types of the human developing lung.** Expression of Ki67 (magenta) was overlaid with expression of ACTA2 (green) for airway smooth muscle cells, CD31 (green) for endothelial cells, ACTA2 (green) and CD31 (yellow) for vascular smooth muscle cells, VIM (green) for mesenchymal cells, PDPN (green) for lymphatic endothelial cells, CD45 (green) for immune cells, SOX2 (green) for SOX2<sup>high</sup> epithelial cells and SOX9 (green) for SOX9<sup>high</sup> epithelial cells. Images represent a single donor for each developmental week. Scale bars correspond to 50  $\mu$ m.



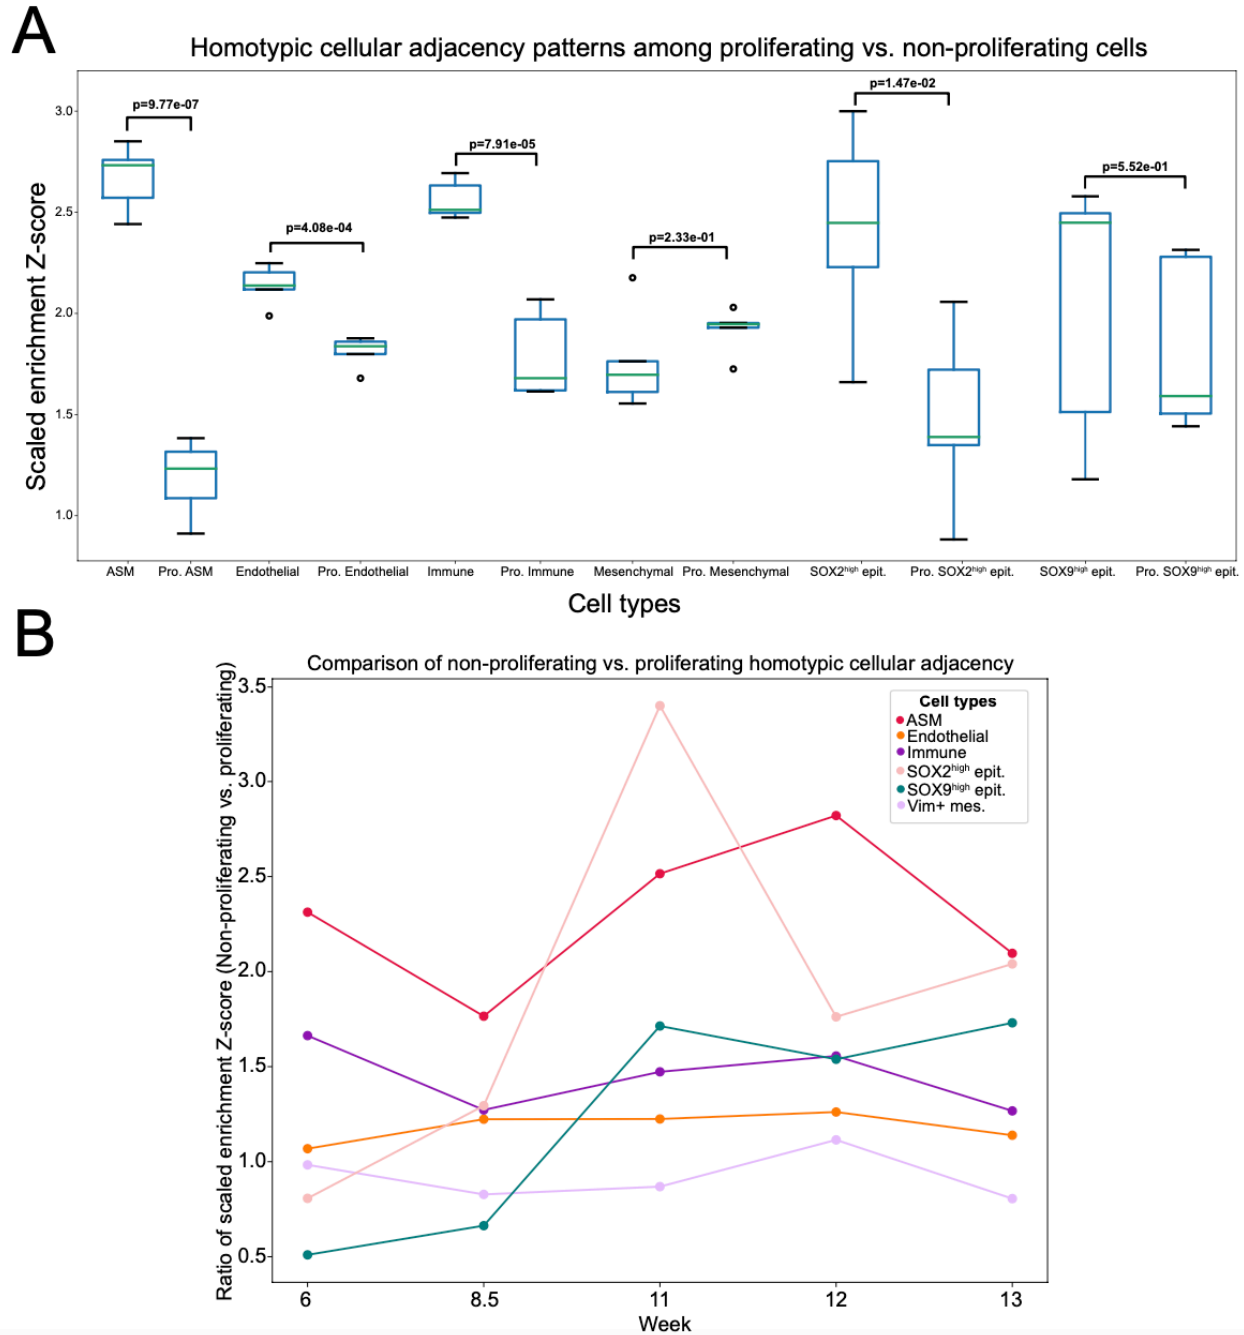

**Supplementary Figure 18. Comparison of homotypic cellular adjacency patterns among the non-proliferating cell types and their proliferating counterparts in the developing human lung.**

**A)** Boxplots summarizing the scaled neighborhood enrichment Z-scores of six different cell types for its own cell type, where the neighborhood enrichment score for each non-proliferating and proliferating cell type across all the five developmental time points was compared in a two-sided Student's t-test. Source data for this figure is provided within the Source Data file. **B)** Lineplots summarizing the ratio of scaled enrichment Z-scores in non-proliferating versus proliferating counterparts of each cell type across the five developmental timepoints, where each line represents a different cell type. Source data for this figure is provided within the Source Data file.

**A**

| Original Ann.                   | Simplified Ann.                 |
|---------------------------------|---------------------------------|
| Airway smooth muscle            | Airway smooth muscle            |
| Endothelial                     | Endothelial                     |
| Ki67+ mesenchymal               | Mesenchymal                     |
| Mesothelium                     | Mesenchymal                     |
| Immune                          | Immune                          |
| SOX2 <sup>high</sup> epithelial | SOX2 <sup>high</sup> epithelial |
| SOX9 <sup>high</sup> epithelial | SOX9 <sup>high</sup> epithelial |
| Vim+ mesenchymal                | Mesenchymal                     |

Week 6

| Original Ann.                   | Simplified Ann.                 |
|---------------------------------|---------------------------------|
| Airway smooth muscle            | Airway smooth muscle            |
| Endothelial                     | Endothelial                     |
| Ki67+ mesenchymal               | Mesenchymal                     |
| Lymphatic endothelial           | Lymphatic endothelial           |
| Immune                          | Immune                          |
| SOX2 <sup>high</sup> epithelial | SOX2 <sup>high</sup> epithelial |
| SOX9 <sup>high</sup> epithelial | SOX9 <sup>high</sup> epithelial |
| Vascular smooth muscle          | Vascular smooth muscle          |
| Vim+ mesenchymal                | Mesenchymal                     |
| Neuronal                        | Mesenchymal                     |
| Chondroblasts                   | Mesenchymal                     |

Week 8.5

| Original Ann.                   | Simplified Ann.                 |
|---------------------------------|---------------------------------|
| Adventitial fibroblast          | Mesenchymal                     |
| Airway fibroblast               | Mesenchymal                     |
| Airway smooth muscle            | Airway smooth muscle            |
| Chondroblast                    | Mesenchymal                     |
| Endothelial                     | Endothelial                     |
| Ki67+ mesenchymal               | Mesenchymal                     |
| Lymphatic endothelial           | Lymphatic endothelial           |
| Immune                          | Immune                          |
| Neuronal                        | Mesenchymal                     |
| SOX2 <sup>high</sup> epithelial | SOX2 <sup>high</sup> epithelial |
| SOX9 <sup>high</sup> epithelial | SOX9 <sup>high</sup> epithelial |
| Vascular smooth muscle          | Vascular smooth muscle          |
| Vim+ mesenchymal                | Mesenchymal                     |

Week 11

| Original Ann.                   | Simplified Ann.                 |
|---------------------------------|---------------------------------|
| Airway smooth muscle            | Airway smooth muscle            |
| Endothelial                     | Endothelial                     |
| Ki67+ mesenchymal               | Mesenchymal                     |
| Lymphatic endothelial           | Lymphatic endothelial           |
| Immune                          | Immune                          |
| SOX2 <sup>high</sup> epithelial | SOX2 <sup>high</sup> epithelial |
| SOX9 <sup>high</sup> epithelial | SOX9 <sup>high</sup> epithelial |
| Vascular smooth muscle          | Vascular smooth muscle          |
| Vim+ mesenchymal                | Mesenchymal                     |
| Neuronal                        | Mesenchymal                     |

Week 12

| Original Ann.                   | Simplified Ann.                 |
|---------------------------------|---------------------------------|
| Airway smooth muscle            | Airway smooth muscle            |
| Chondroblast                    | Mesenchymal                     |
| Endothelial                     | Endothelial                     |
| Ki67+ mesenchymal               | Mesenchymal                     |
| Lymphatic endothelial           | Lymphatic endothelial           |
| Neuronal                        | Mesenchymal                     |
| Immune                          | Immune                          |
| Pericytes                       | Mesenchymal                     |
| SOX2 <sup>high</sup> epithelial | SOX2 <sup>high</sup> epithelial |
| SOX9 <sup>high</sup> epithelial | SOX9 <sup>high</sup> epithelial |
| Vascular smooth muscle          | Vascular smooth muscle          |
| Vim+ mesenchymal                | Mesenchymal                     |

Week 13

**B**

Week 11

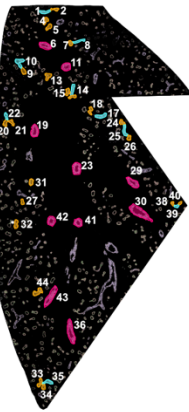

Week 12

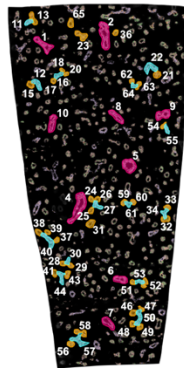

Week 13

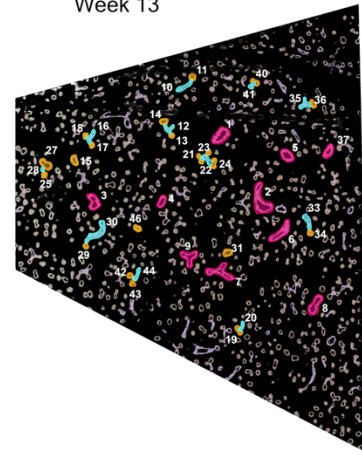

■ Large SOX2<sup>high</sup> ■ SOX2<sup>high</sup> ■ SOX9<sup>high</sup>

**C**

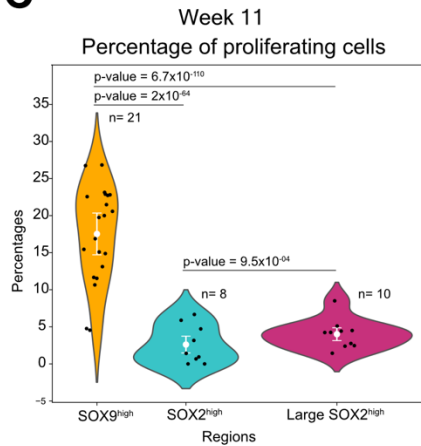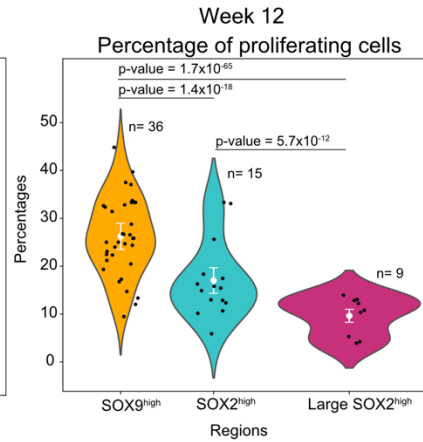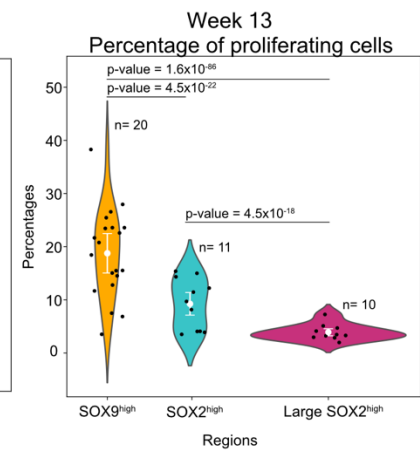

**Supplementary Figure 19. Cell-type specific proliferation patterns in the developing human lung.** **A)** Simplified annotations used for the proliferation analysis. The first column shows the original cell type annotation and the second column shows the simplified annotations for the proliferation analysis. **B)** The selected regions for analysis and comparison of proliferation patterns in relatively smaller SOX2<sup>high</sup> (cyan), relatively larger SOX2<sup>high</sup> (magenta) and SOX9<sup>high</sup> (orange) epithelial regions. ID of each identified and used region for analysis is stated on the tissue images. **C)** Violin plots displaying the distribution of the fraction of proliferating cells in relatively smaller SOX2<sup>high</sup> (cyan), relatively larger SOX2<sup>high</sup> (magenta) and SOX9<sup>high</sup> (orange) epithelial regions at each week. The x-axis represents the three different airway structures, and the y-axis indicates the percentage of proliferating cells in each of the (n) number of manually selected regions represented as a dot, and the error bar represents mean $\pm$ 2 $\times$ SEM (standard error of the mean). The statistical significance of the differences in proliferation degree are summarized with a two-sided Fisher's exact test p-values. Source data for this figure is provided within the Source Data file.

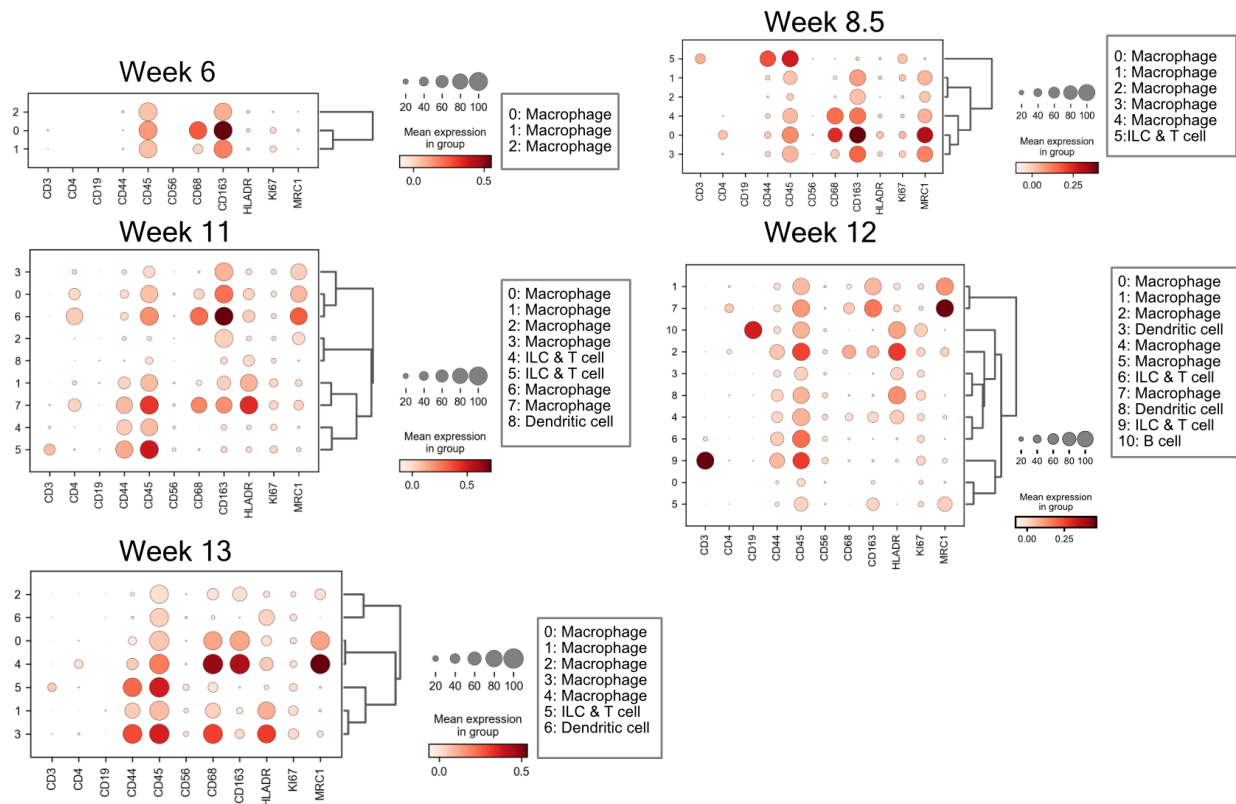

**Supplementary Figure 20. Subclustering of the major immune cell clusters identified in developing human lung.** The major immune cluster identified at each week was re-clustered and annotated based on the marker expressions in the dot plots. The size of the circles indicates the percentage of cells expressing the marker in each cluster, where dark red color indicates high and white color indicates low expression.

## Cellular adjacency among immune and other cell types

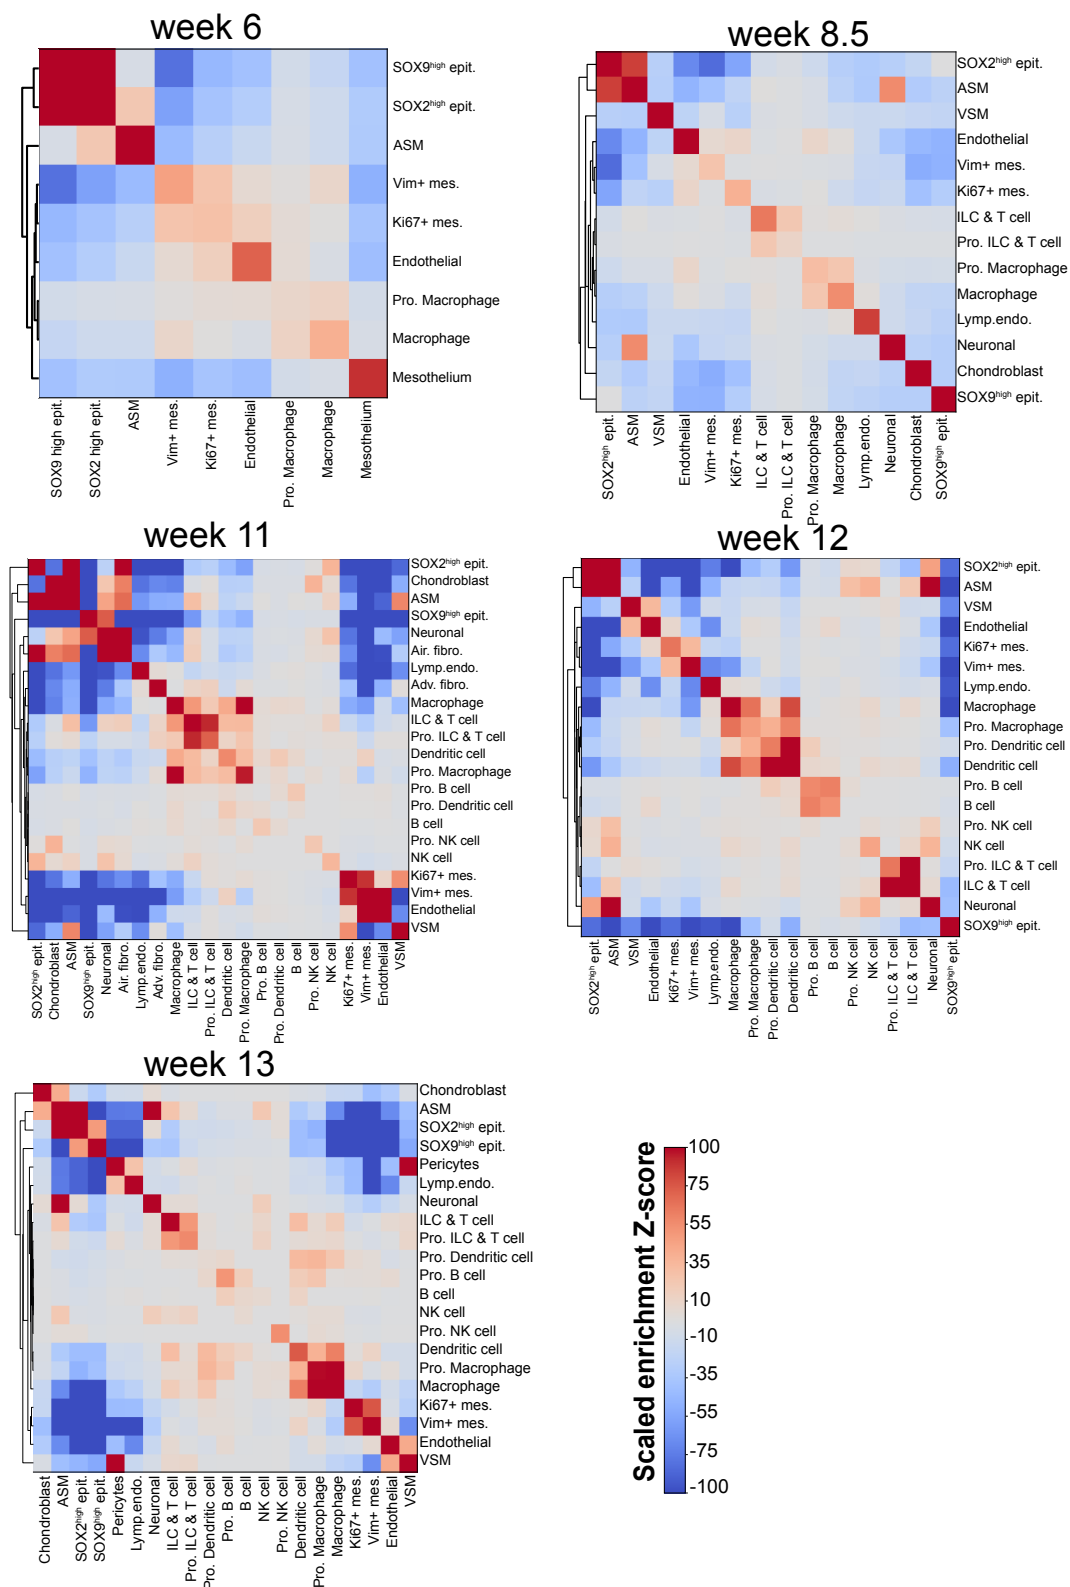

**Supplementary Figure 21. Heatmaps with dendrograms summarizing enrichment of cellular adjacency patterns among immune and other cell types based on the scaled Z-scores. Dark red**

color indicates cellular adjacency patterns with high enrichment  $Z$ -score and dark blue color indicates cellular adjacency patterns with low enrichment  $Z$ -score.

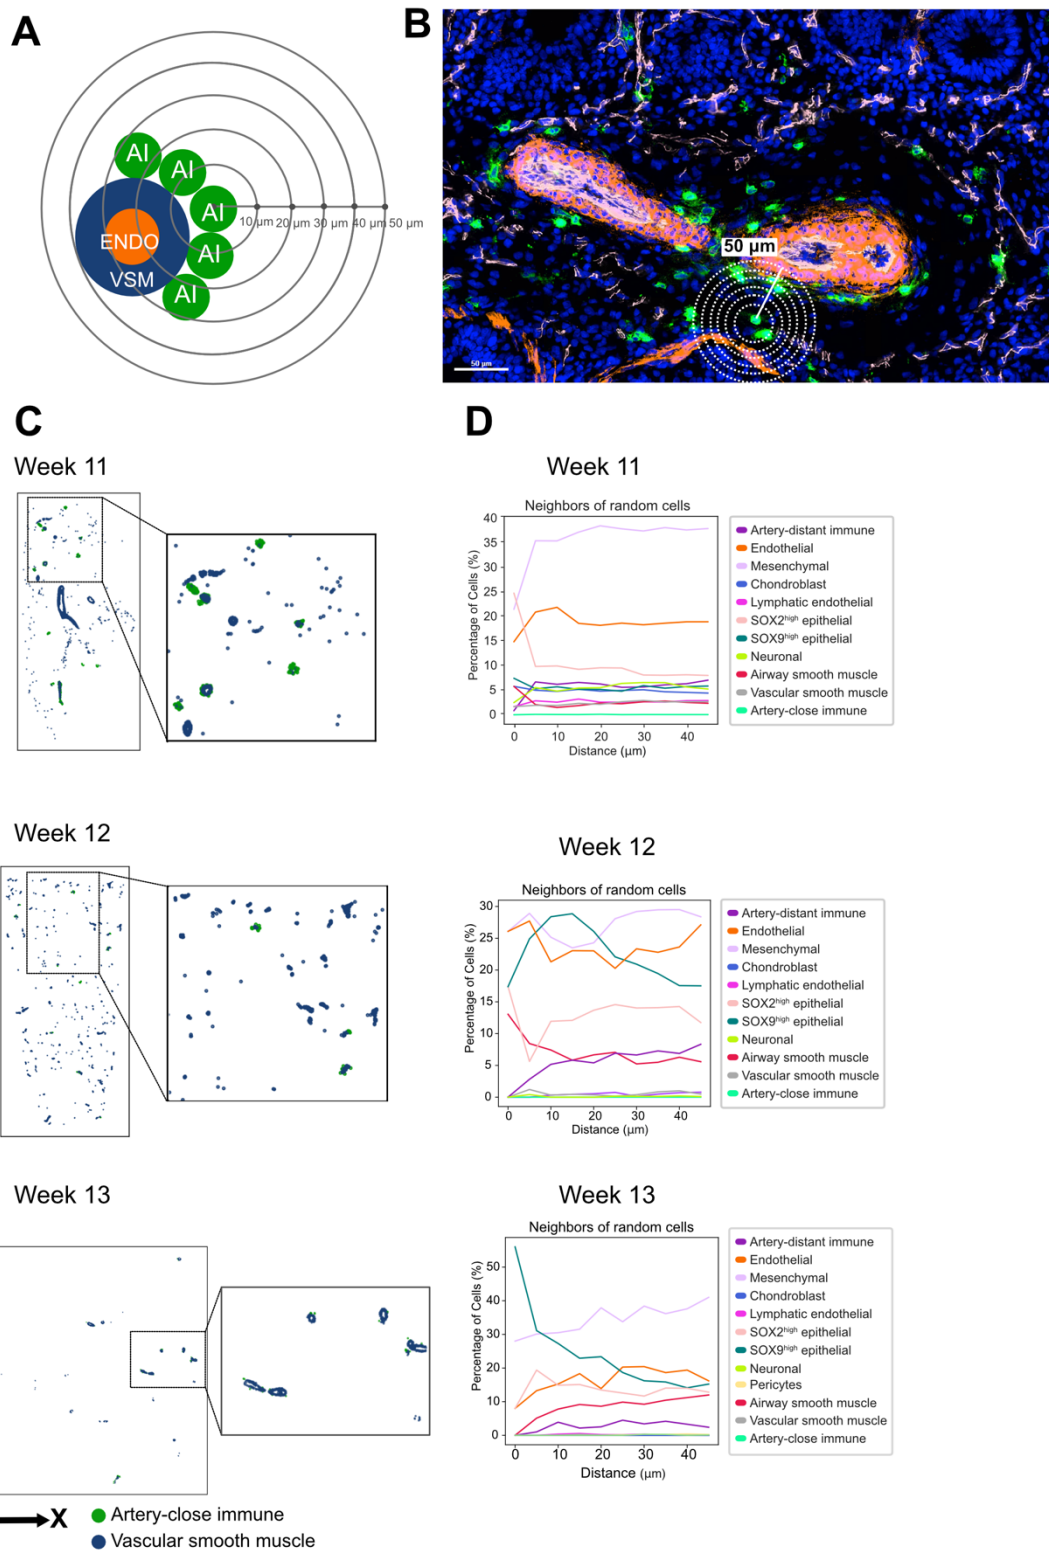

**Supplementary Figure 22. Neighborhood cellular composition analysis of immune cells encircling the arteries.** **A)** Scheme describing the neighborhood cellular composition analysis of the artery-close immune cells (AI) encircling vascular smooth muscle cells (VSM) and endothelial cells (ENDO). **B)** Snapshots of immune cells encircling arteries and a representation of the analyzed cellular composition for a radius of 50  $\mu\text{m}$  around each detected artery-close immune cell. DAPI in blue, CD45 (immune marker) in green, ACTA2 (vascular smooth muscle marker) in orange and CD144 (endothelial marker) in pink. Image represent a single donor. Scale bar corresponds to 50  $\mu\text{m}$ . **C)** The xy-scatter plots show the location of immune cells detected around arteries and vascular smooth muscle cells. **D)** Line plots summarizing the cell type and count of neighbors of randomly selected cells within a radius of 50  $\mu\text{m}$  for weeks 11,12 and 13. The x-axis represents the distance in  $\mu\text{m}$  and the y-axis represents the fraction of cells. Source data for this figure is provided within the Source Data file.



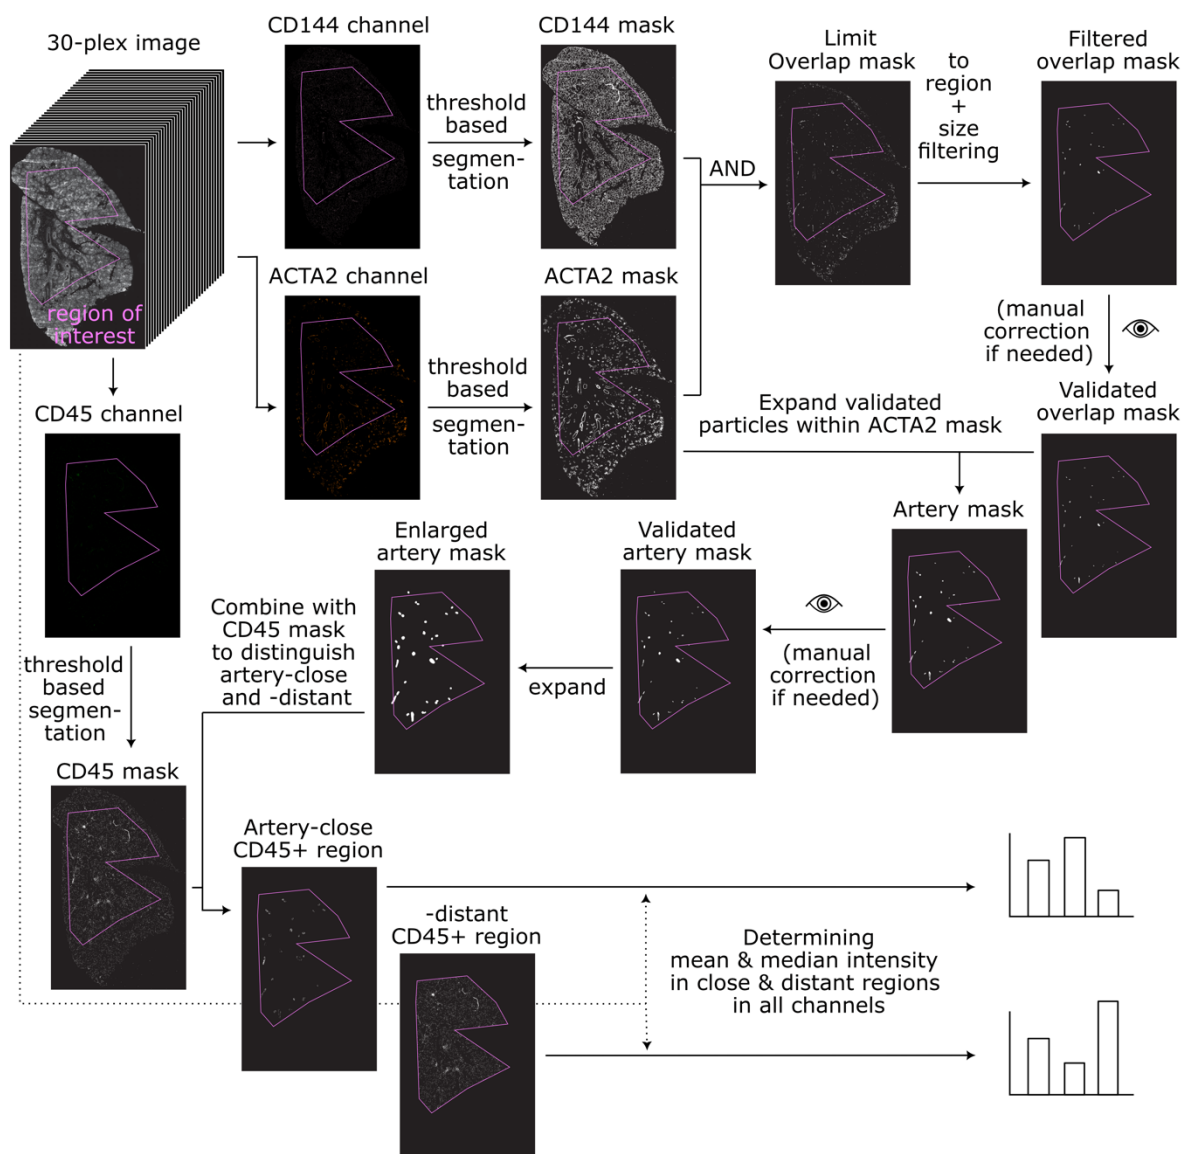

**Supplementary Figure 23. Image analysis workflow to validate marker expression patterns of artery-close and -distant immune cells without instance segmentation.** The workflow was developed as an ImageJ Macro available at <https://github.com/CellProfiling/HDCA-FetalLung-SpatialProteomics/> (10.5281/zenodo.11650173). Briefly, the raw image stack was loaded and the user was prompted to select a region of interest, to which all analysis including threshold determination would be restricted. Next, the channel images for ACTA2, CD144, and CD45 were extracted, pre-processed, and subjected to semantic segmentation using ImageJ's Triangle threshold algorithm (for more details see Methods). Masks derived from ACTA2 and CD144 channel images were combined using the logical AND operation, and the resulting mask was filtered with a size filter: all objects smaller than 2000 px were removed. After this step, the mask was displayed to the user asking to validate it and to eventually add any missed-out artery regions or to remove artifacts. The objects in the validated mask were expanded within the ACTA2 mask to extend to the whole

artery region. The user was asked again for validation. Then, the expanded validated mask was expanded again using a maximum filter (radius of 80 px = 40  $\mu$ m) to cover the peri-arterial regions. This mask was then used to dissect the immune cell mask coming from the CD45 channel into artery-close and artery-distant regions. The artery-close and the -distant mask were used to determine the mean and median intensity within -close and -distant immune cell regions, in all image channels of the raw 30-plex image. The example lung tissue image shown in the workflow is from the 11-pcw-old sample.

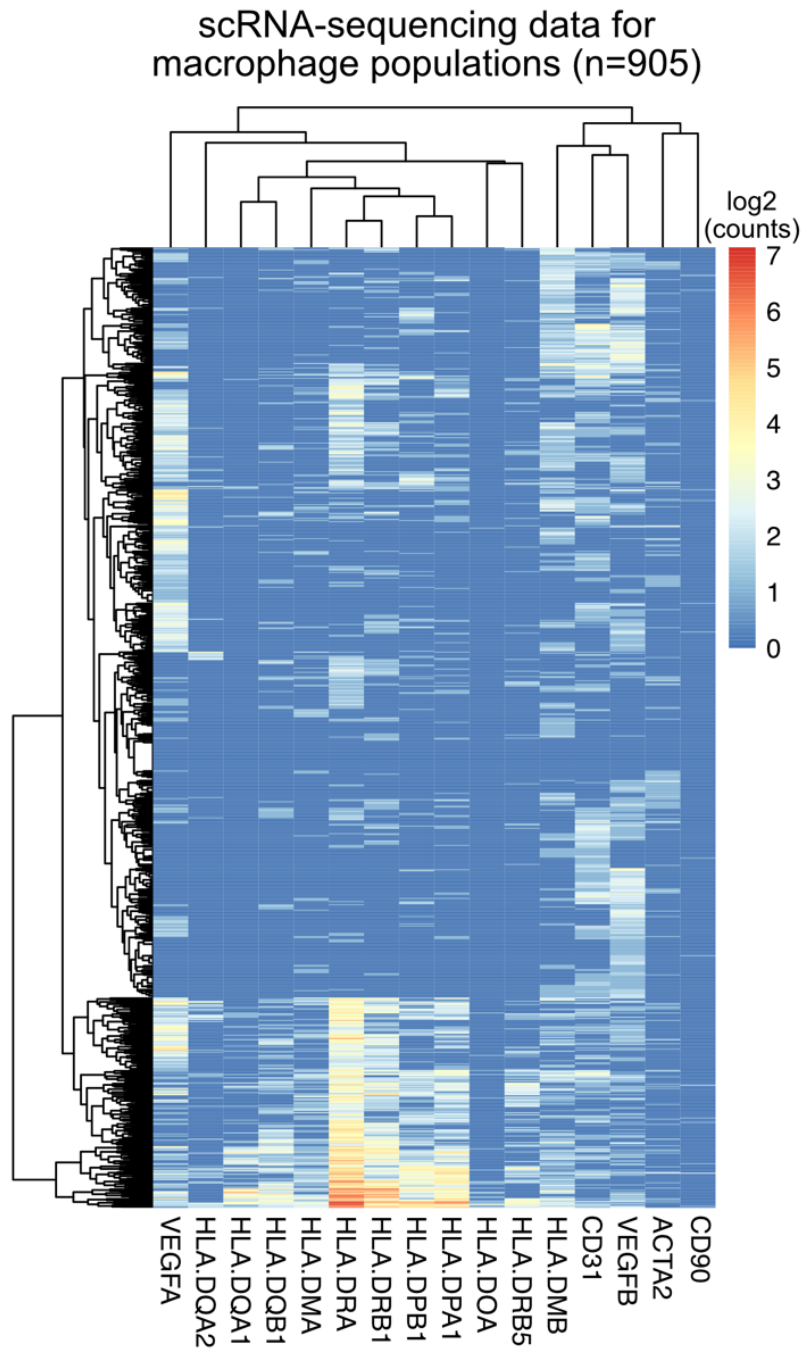

**Supplementary Figure 24. Heatmap summarizing the expression patterns of selected genes in macrophage populations which were identified in single-cell transcriptomics human developing lung dataset by Sountoulidis *et al*<sup>1</sup>.** A total of 905 cells (on the y-axis) were annotated as macrophages across the developmental weeks from 5 to 14. The heatmap summarizes the  $\log_2(\text{normalized UMI counts}+1)$  for 16 selected genes.

## REFERENCES:

- 1 Sountoulidis, A. *et al.* A topographic atlas defines developmental origins of cell heterogeneity in the human embryonic lung. *Nature Cell Biology* **25**, 351-365 (2023). <https://doi.org/10.1038/s41556-022-01064-x>
- 2 Tyanova, S. *et al.* The Perseus computational platform for comprehensive analysis of (prote)omics data. *Nature Methods* **13**, 731-740 (2016). <https://doi.org/10.1038/nmeth.3901>
- 3 Zhang, Y., Parmigiani, G. & Johnson, W. E. ComBat-seq: batch effect adjustment for RNA-seq count data. *NAR Genomics and Bioinformatics* **2**, lqaa078 (2020). <https://doi.org/10.1093/nargab/lqaa078>
